# Supplementary material
Source: PubMed Central journal article supplement (PMC5753767)
Supplement: NIHMS922192-supplement-1.pdf [file NIHMS922192-supplement-1.pdf]

## Supporting Information

### Antiplasmodial alkaloids from bulbs of *Amaryllis belladonna*

Namki Cho, Yongle Du, Ana Lisa Valenciano, Maria L. Fernández-Murga, Michael Goetz, Jason Clement, Maria B. Cassera, David G. I. Kingston

## Experimental Section

### General experimental procedures

UV spectra were measured on a Shimadzu UV-1201 spectrophotometer and specific rotations were recorded on a JASCO P-2000 polarimeter. NMR spectra were obtained on a Bruker Avance 400 spectrometer; chemical shifts are given in  $\delta$  (ppm), and coupling constants are reported in Hz. Mass spectra were obtained on an Agilent 6220 LC-TOF-MS in the positive ion mode. ECD spectra were obtained on a JASCO J-810 spectropolarimeter with a 1 cm cell in MeOH at room temperature with constant nitrogen flushing under the following conditions: speed 100 nm/min, time constant 1 s, bandwidth 1.0 nm. Semipreparative HPLC was performed using Shimadzu LC-10AT instrument with a semipreparative C<sub>18</sub> Phenomenex Luna column (5  $\mu$ m, 250  $\times$  10 mm). Solid phase extractions were performed with Thermo Scientific HyperSep C<sub>18</sub> 500 mg, 3 mL SPE cartridges, and all RP TLC was conducted with Sorbtech C<sub>18</sub>-W silica TLC plates. All isolated compounds were purified to 95% or better, as judged by HPLC (UV and ELSD detection) and NMR before antiplasmodial assay.

### Plant material

Specimens of bulbs of *Amaryllis belladonna* Steud. (C. Morenburg 128) were collected and identified by Cori Morenberg of the New York Botanical Garden in the succulent garden of the Quail Botanical Gardens, Encinitas, CA on September 6, 1995. [http://sweetgum.nybg.org/science/vh/specimen\\_details.php?irn=269183](http://sweetgum.nybg.org/science/vh/specimen_details.php?irn=269183)

### Extraction and isolation

Dried, powdered plant material (1.17 Kg) was exhaustively extracted with MeOH at room temperature to give 39 g of an extract which was partitioned into aqueous MeOH and dichloromethane soluble portions. The aqueous MeOH-soluble portion of the crude extract was passed through a polyvinyl pyrrolidone column to give a detanninized extract designated CM00128a (X-4283), and 2.0 g of this extract was made available to Virginia Tech. A 1.5 g portion of this extract, which had an IC<sub>50</sub> against *P. falciparum* Dd2 of 1.25  $\mu$ g/mL, was suspended in aqueous MeOH (MeOH–H<sub>2</sub>O, 9:1, 100 mL) and extracted with hexane (4  $\times$  100 mL portions) to give an inactive hexane-soluble fraction (165.0 mg, IC<sub>50</sub> >10  $\mu$ g/mL). The aqueous fraction was then diluted to MeOH–H<sub>2</sub>O, 6:4 (150 mL) and further extracted with CH<sub>2</sub>Cl<sub>2</sub> (4  $\times$  100 mL portions) and EtOAc (4  $\times$  100 mL portions) to yield the CH<sub>2</sub>Cl<sub>2</sub>-soluble (310.0 mg, IC<sub>50</sub> approximately 2.5  $\mu$ g/mL) and EtOAc-soluble fractions (210.0 mg, IC<sub>50</sub> approximately 2.5  $\mu$ g/mL). The active CH<sub>2</sub>Cl<sub>2</sub> fraction was chromatographed by open column on a normal silica gel with the solvent system from 30:1 to 1:1 CH<sub>2</sub>Cl<sub>2</sub>:MeOH. Five fractions (AC1-AC5) were collected based on TLC analyses. The active fraction AC2 (IC<sub>50</sub> < 1.25  $\mu$ g/mL) was further separated by HPLC on a semi-preparative C<sub>18</sub>

column (Phenomenex Luna column, 5  $\mu\text{m}$ , 25  $\times$  10 mm) eluted with a solvent gradient from 60:40 to 80:20  $\text{CH}_3\text{CN}:\text{H}_2\text{O}$  over 25 min at a flow rate of 2.5 mL/min. This process gave compounds **5** (10.4 mg) and **6** (0.4 mg), and semi-pure compound **2** (5.1 mg). The collected semi-pure compound **2** was then further purified by HPLC on the same column eluted with an isocratic  $\text{CH}_3\text{OH}:\text{H}_2\text{O}$  flow of 75:25 for 15 min, which yielded compound **2** (1.0 mg) and compound **3** (0.8 mg). The active EtOAc fraction was chromatographed by open column on a normal Silica gel with the solvent system from 20:1 to 3:1  $\text{CH}_2\text{Cl}_2:\text{MeOH}$ . Four fractions (AE1-AE4) were collected according to TLC analyses and the fraction AE2 ( $2.5 < \text{IC}_{50} < 5.0 \mu\text{g}/\text{mL}$ ) was further separated by HPLC on a semi-preparative  $\text{C}_{18}$  column eluted with isocratic 50:50  $\text{CH}_3\text{CN}:\text{H}_2\text{O}$  for 25 min, which yielded compound **1** (6.4 mg). The active fraction AE3 ( $2.5 < \text{IC}_{50} < 5.0 \mu\text{g}/\text{mL}$ ) was chromatographed by open column on a RP  $\text{C}_{18}$  Silica gel with the solvent system from 20:80 to 60:40  $\text{MeOH}:\text{H}_2\text{O}$ , which yielded compound **4** (7.0 mg).

### Antimalarial and antiproliferative bioassays

Dose-dependent growth inhibition of each fraction and pure compounds was assessed against *P. falciparum* strain Dd2 (chloroquine-resistant) in a 72h growth assay in the presence of inhibitor as described previously with minor modifications. Ring stage parasite cultures (100  $\mu\text{L}/\text{well}$ , 1% hematocrit and 1% parasitaemia) were grown for 72 h in the presence of increasing concentrations of the inhibitor in a humidified chamber at 37  $^\circ\text{C}$  and low oxygen conditions. After 72 h in culture, parasite viability was determined by DNA quantitation using SYBR Green I. Artemisinin was used as a positive control with an  $\text{IC}_{50}$  value of  $12.1 \pm 0.1 \text{ nM}$ . Parasite growth was normalized to untreated controls. The  $\text{IC}_{50}$  calculations were performed with GraphPad Prism software using a nonlinear regression curve fitting, and the reported values represent averages of three independent determinations with each determination in duplicate, and are expressed  $\pm$  SEM. The A2780 ovarian cancer cell line assay was performed by the protocol of Virginia Polytechnic Institute and State University, as previously reported.

### 3.5. Compound information

1,4-Dihydroxy-3-methoxypowellan (**1**): white amorphous powder;  $[\alpha]^{25}_{\text{D}} -37$  (c 0.3, MeOH); UV (MeOH)  $\lambda_{\text{max}}$  (log  $\epsilon$ ) 254 nm;  $^1\text{H}$  NMR (400 MHz,  $\text{CDCl}_3$ ) and  $^{13}\text{C}$  NMR (100 MHz,  $\text{CDCl}_3$ ) data, see Table 1 and Figures S1 – S6; HRESIMS found  $m/z$  349.1492  $[\text{M}]^+$  (calcd for  $\text{C}_{18}\text{H}_{23}\text{NO}_6$  349.1520).

Distichamine (**2**): yellow amorphous powder;  $[\alpha]^{25}_{\text{D}} -49$  (c 0.3, MeOH); UV (MeOH)  $\lambda_{\text{max}}$  (log  $\epsilon$ ) 254 nm;  $^1\text{H}$  NMR (400 MHz, DMSO) and  $^{13}\text{C}$  NMR (100 MHz, DMSO) data, see Figures S7 – S8; HRESIMS found  $m/z$  329.1269  $[\text{M}]^+$  (calcd for  $\text{C}_{18}\text{H}_{19}\text{NO}_5$  329.1263).

11-O-Acetyllambelline (**3**): white amorphous powder;  $[\alpha]^{25}_{\text{D}} +25$  (c 0.3, MeOH); UV (MeOH)  $\lambda_{\text{max}}$  (log  $\epsilon$ ) 254 nm;  $^1\text{H}$  NMR (400 MHz, DMSO) and  $^{13}\text{C}$  NMR (100 MHz, DMSO) data, see Table 1 and Figures S9 – S10. HRESIMS found  $m/z$  374.1621  $[\text{M}+\text{H}]^+$  (calcd for  $\text{C}_{20}\text{H}_{24}\text{NO}_6$  374.1604).

Ambelline (**4**): white amorphous powder;  $[\alpha]^{25}_{\text{D}} +37$  (c 0.3, MeOH); UV (MeOH)  $\lambda_{\text{max}}$  (log  $\epsilon$ ) 254 nm;  $^1\text{H}$  NMR (400 MHz, DMSO) and  $^{13}\text{C}$  NMR (100 MHz, DMSO) data, see Figures S11 – S12. HRESIMS found  $m/z$  332.1497  $[\text{M}+\text{H}]^+$  (calcd for  $\text{C}_{18}\text{H}_{22}\text{NO}_5$  332.1492).

Acetylcaranine (**5**): yellow amorphous powder;  $[\alpha]^{25}_{\text{D}} -30$  (c 0.3, MeOH); UV (MeOH)  $\lambda_{\text{max}}$  (log  $\epsilon$ ) 254 nm;  $^1\text{H}$  NMR (400 MHz,  $\text{CDCl}_3$ ) and  $^{13}\text{C}$  NMR (100 MHz,  $\text{CDCl}_3$ ) data, see Table 1 and Figures S13 – S15; HRESIMS found  $m/z$  313.1413  $[\text{M}+\text{H}]^+$  (calcd for  $\text{C}_{18}\text{H}_{20}\text{NO}_4$  313.1387).

Hippadine (**6**): yellow amorphous powder;  $[\alpha]^{25}_{\text{D}} +17$  (c 0.3, MeOH); UV (MeOH)  $\lambda_{\text{max}}$  (log  $\epsilon$ ) 254 nm;  $^1\text{H}$  NMR (400 MHz, DMSO) data, see Figure S16; HRESIMS found  $m/z$  264.0633  $[\text{M}+\text{H}]^+$  (calcd for  $\text{C}_{16}\text{H}_{10}\text{NO}_3$  264.0661).

## List of Supporting Information

- S1.  $^1\text{H}$  NMR spectrum (400 MHz) of compound **1** in  $\text{CDCl}_3$
- S2.  $^{13}\text{C}$  NMR spectrum (400 MHz) of compound **1** in  $\text{CDCl}_3$
- S3. COSY spectrum of compound **1** in  $\text{CDCl}_3$
- S4. HSQC spectrum of compound **1** in  $\text{CDCl}_3$
- S5. HMBC spectrum of compound **1** in  $\text{CDCl}_3$
- S6. NOESY spectrum of compound **1** in  $\text{CDCl}_3$
- S7.  $^1\text{H}$  NMR spectrum (400 MHz) of compound **2** in DMSO
- S8.  $^{13}\text{C}$  NMR spectrum (400 MHz) of compound **2** in DMSO
- S9.  $^1\text{H}$  NMR spectrum (400 MHz) of compound **3** in DMSO
- S10.  $^{13}\text{C}$  NMR spectrum (400 MHz) of compound **3** in DMSO
- S11.  $^1\text{H}$  NMR spectrum (400 MHz) of compound **4** in DMSO
- S12.  $^{13}\text{C}$  NMR spectrum (400 MHz) of compound **4** in DMSO
- S13.  $^1\text{H}$  NMR spectrum (400 MHz) of compound **5** in  $\text{CDCl}_3$
- S14.  $^{13}\text{C}$  NMR spectrum (400 MHz) of compound **5** in  $\text{CDCl}_3$
- S15. HMBC spectrum of compound **5** in  $\text{CDCl}_3$
- S16.  $^1\text{H}$  NMR spectrum (400 MHz) of compound **6** in DMSO
- S17. CD spectrums of compounds **1-6**
- S18. Dose-response curves for antiplasmodial assays of compounds **1, 3, 4, and 5**.

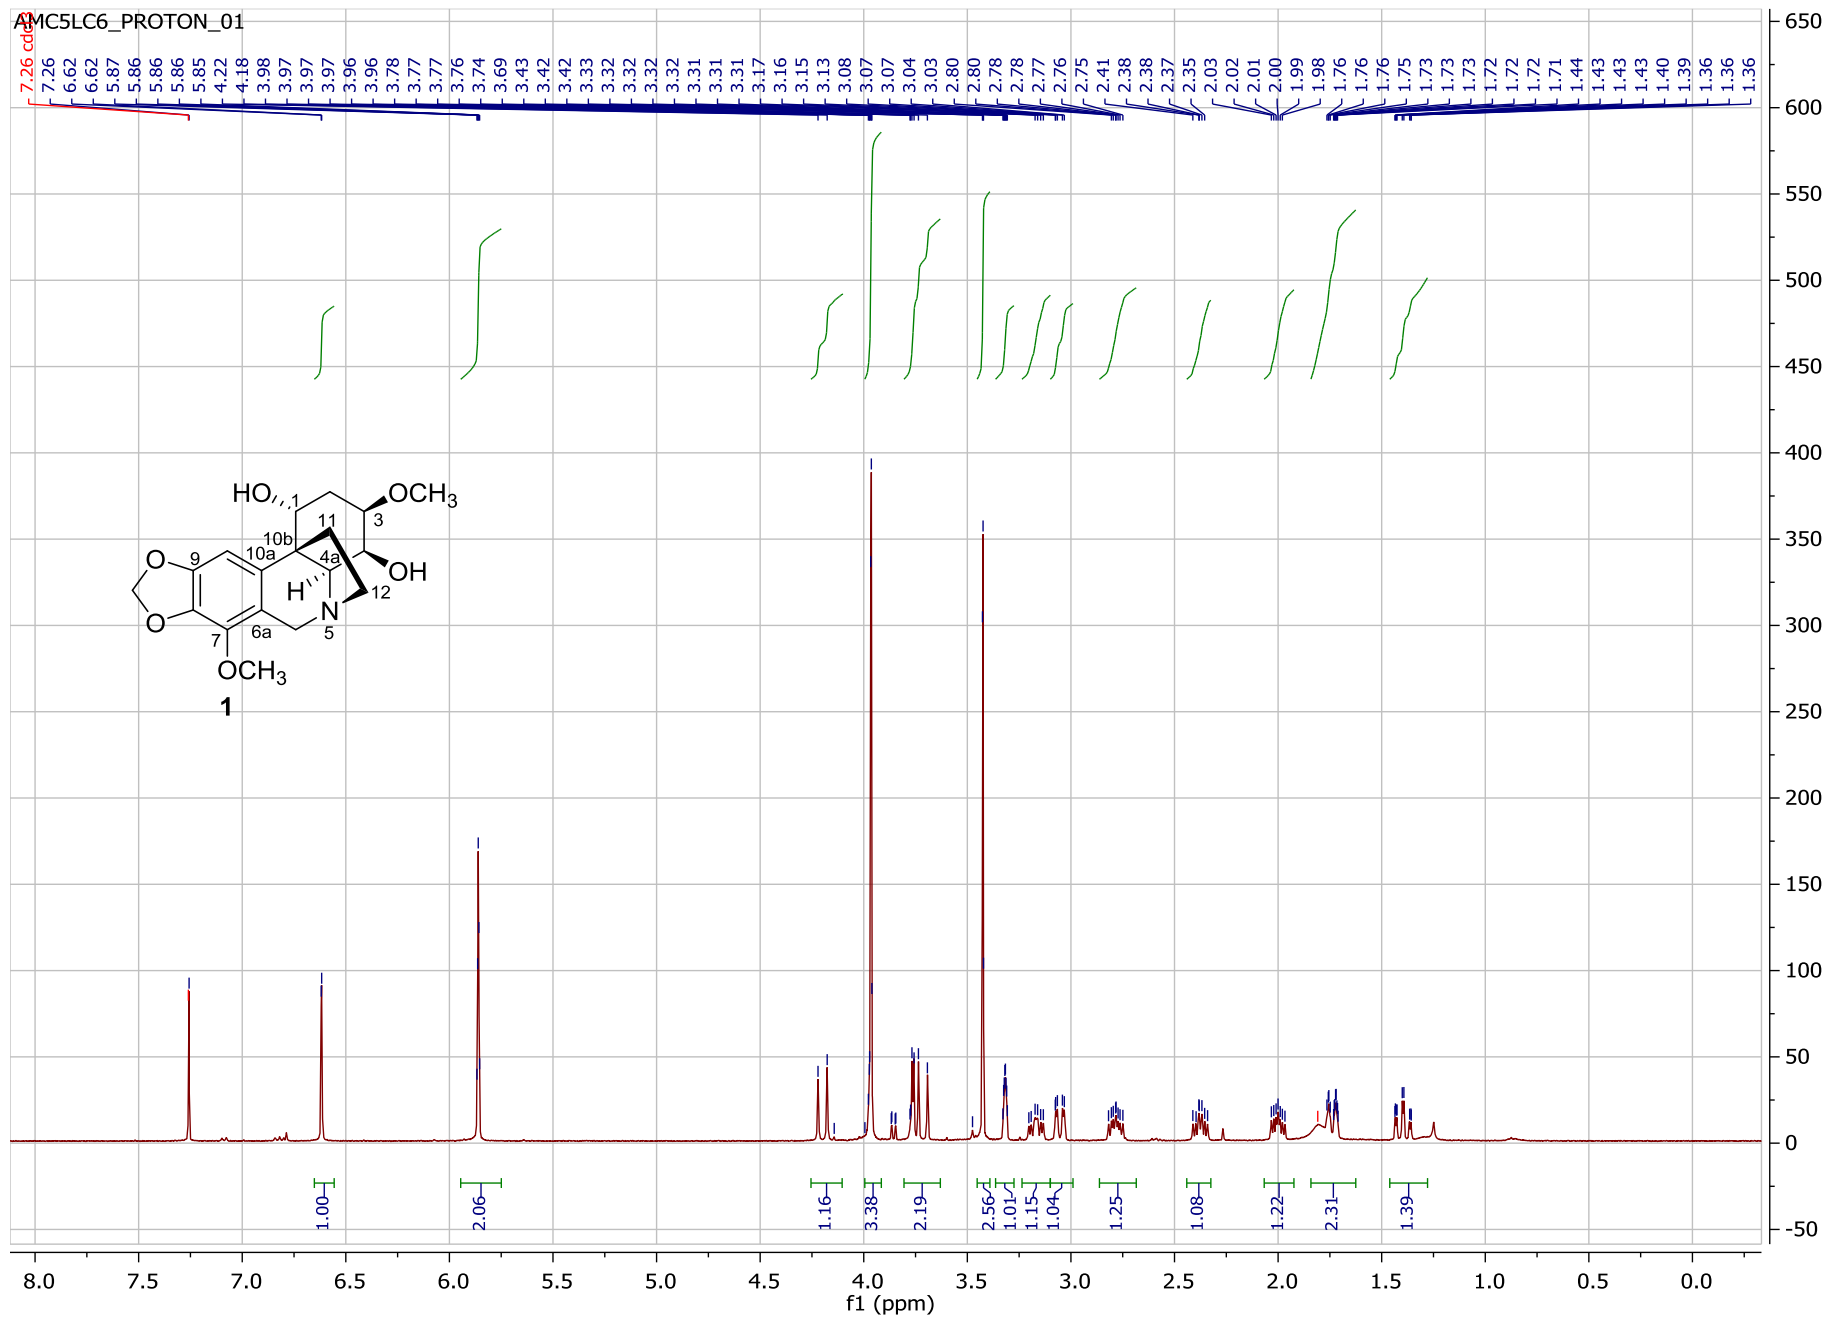

Figure S1. <sup>1</sup>H NMR spectrum (400 MHz) of compound **1** in CDCl<sub>3</sub>

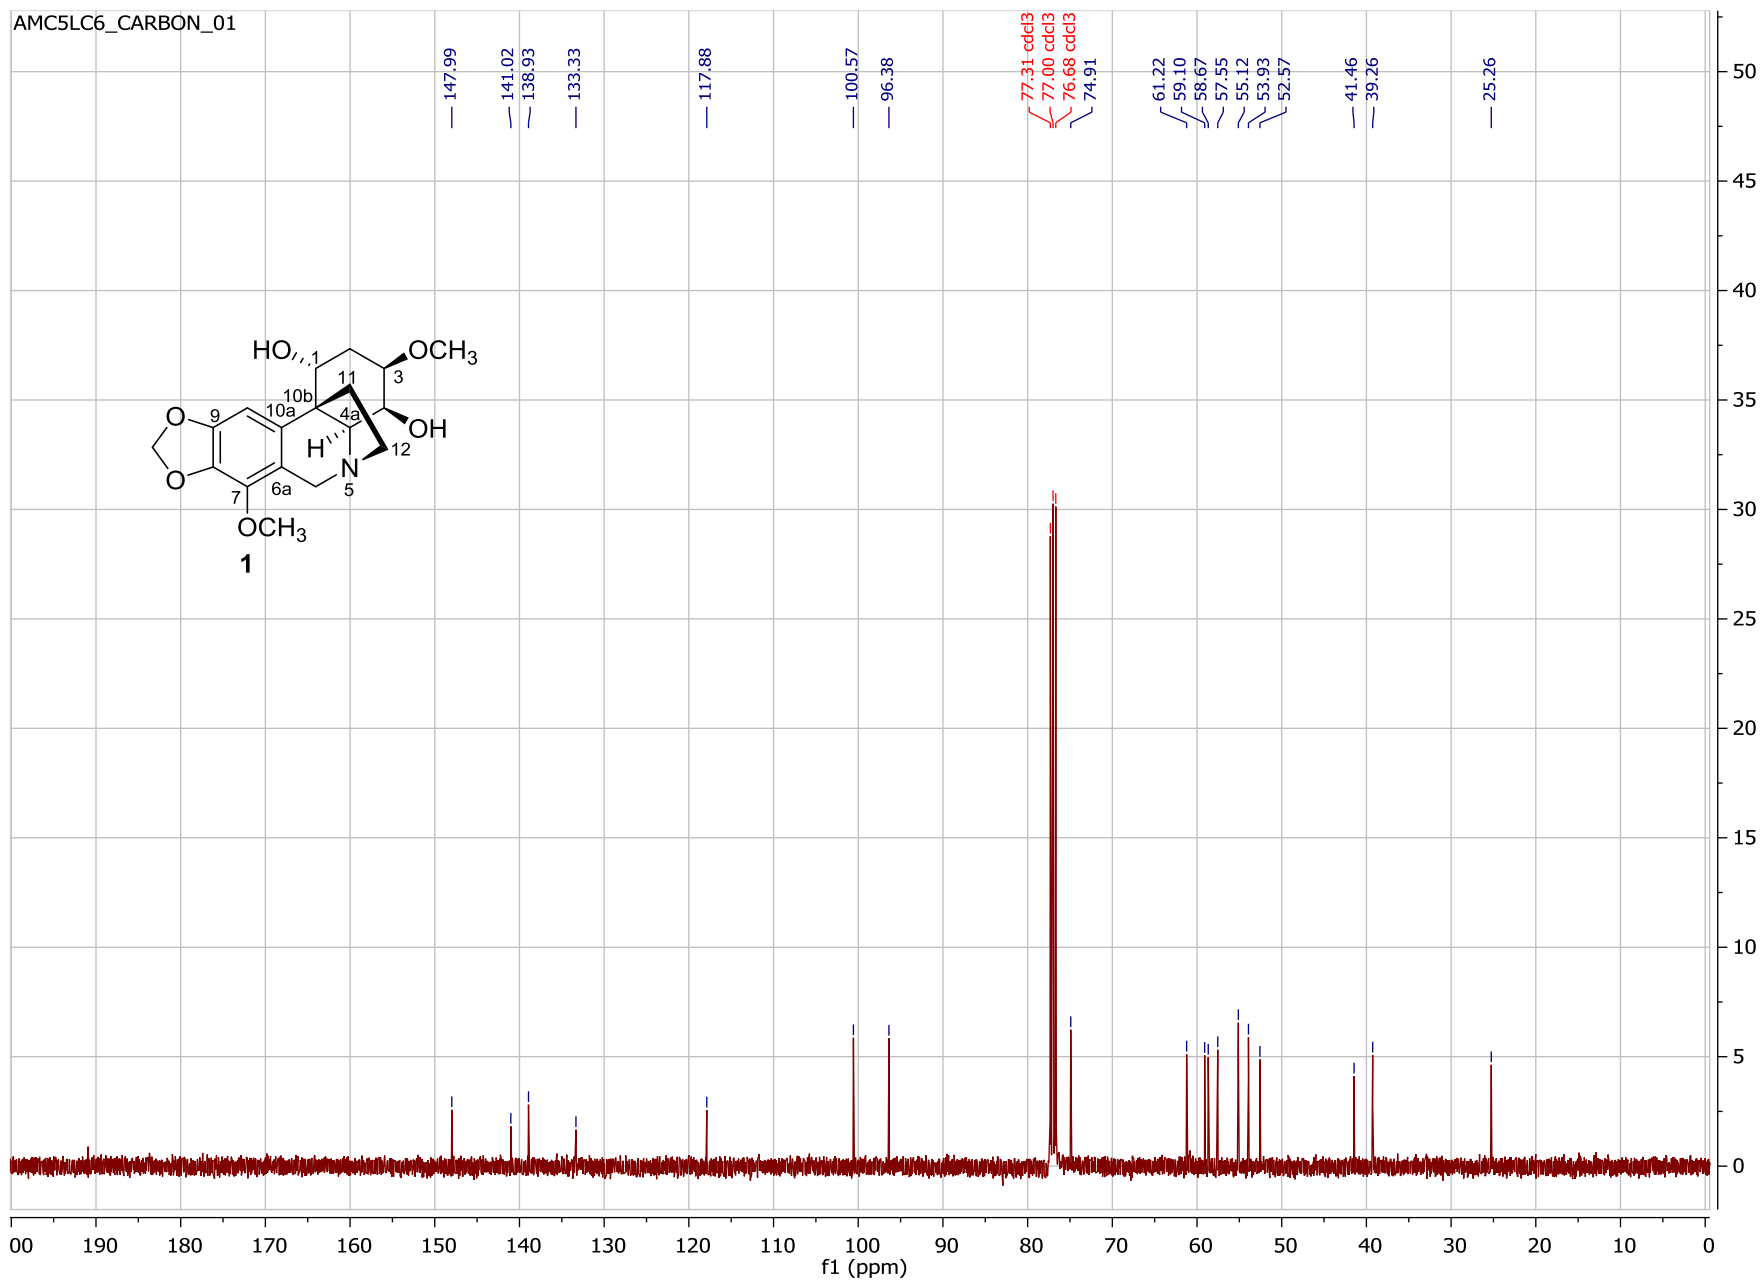

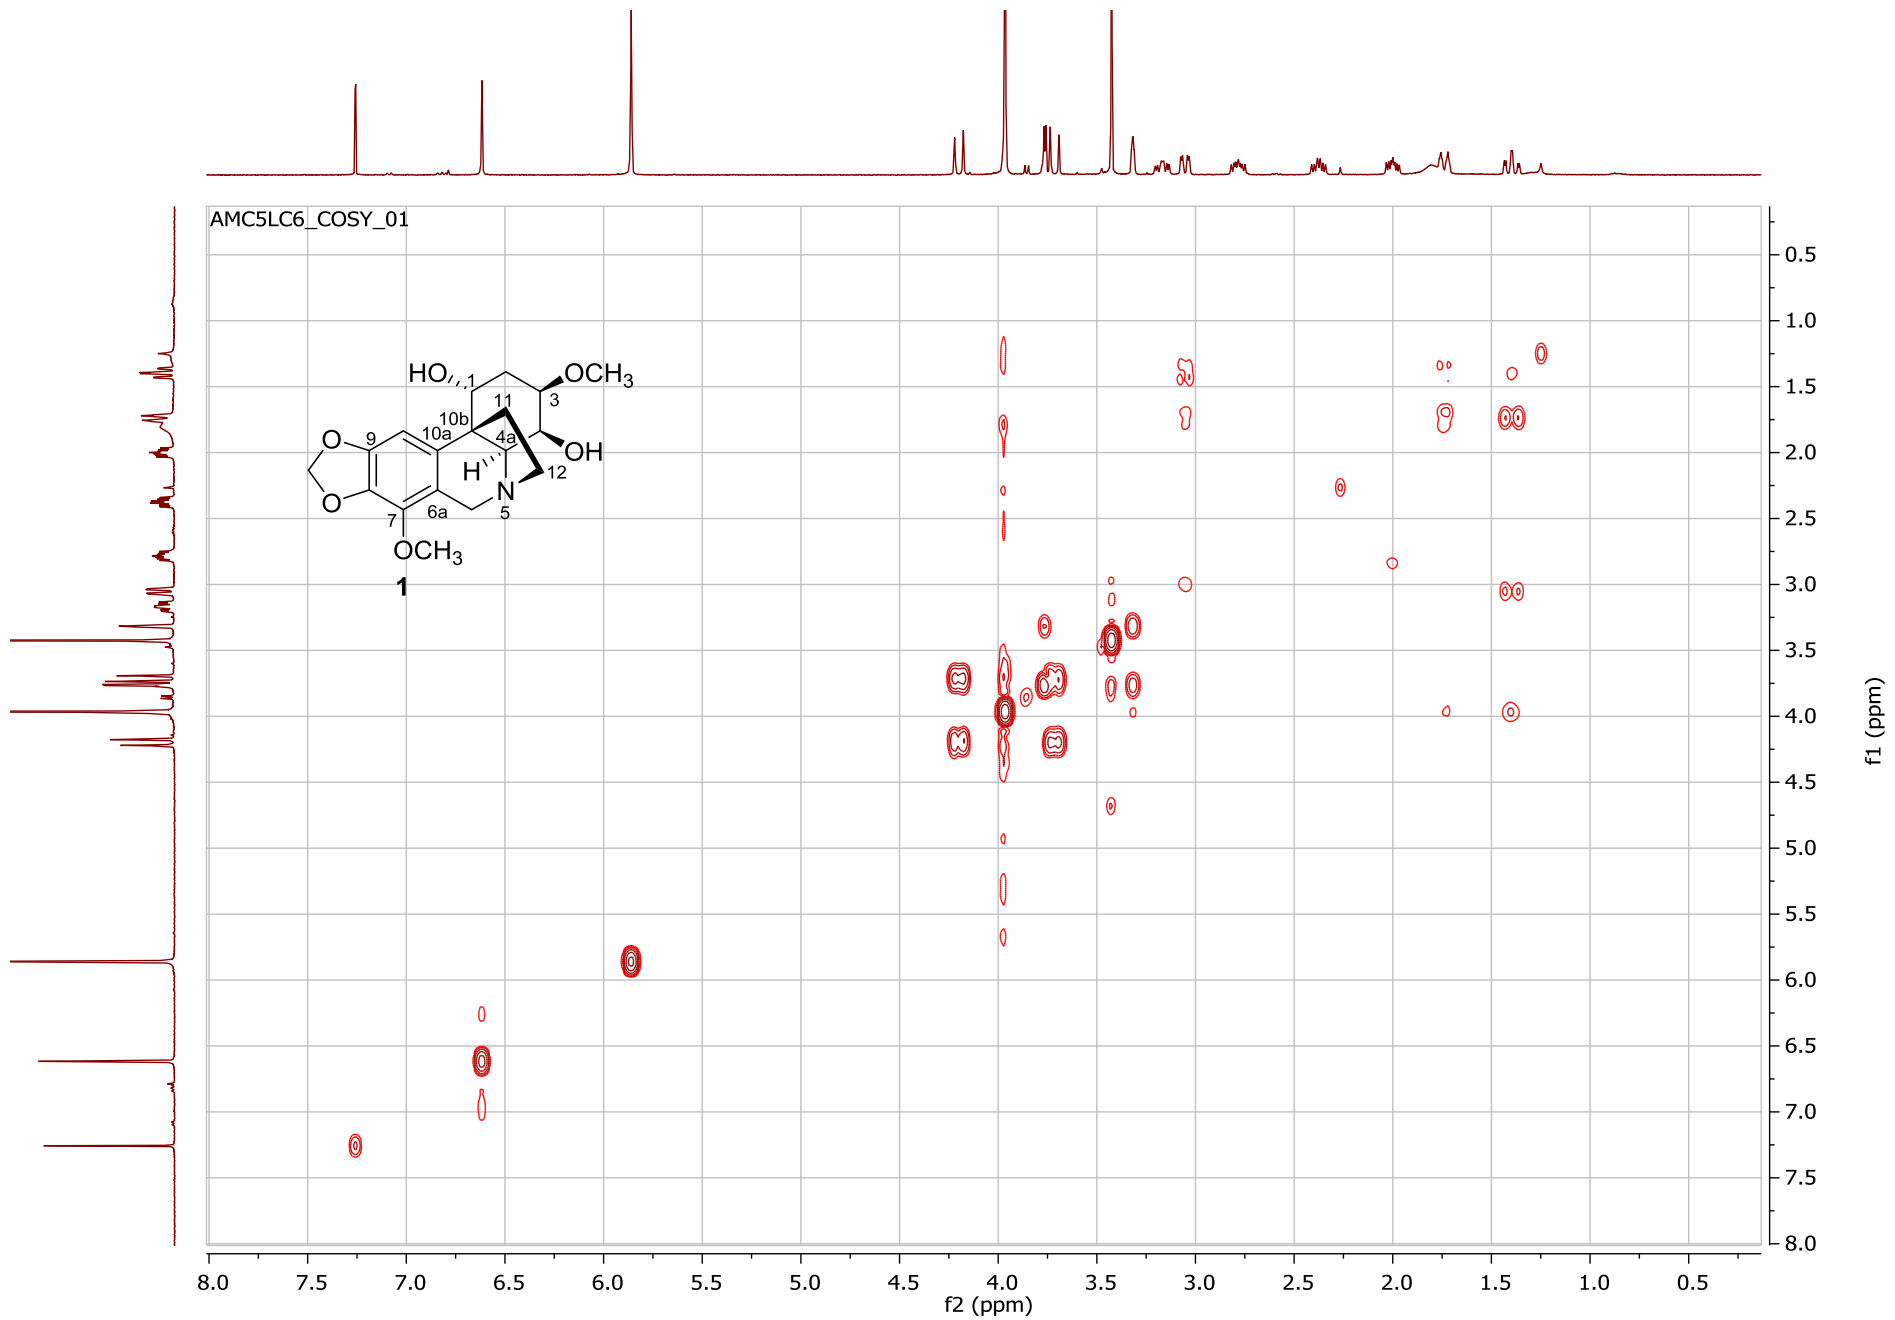

Figure S3. COSY spectrum of compound **1** in CDCl<sub>3</sub>

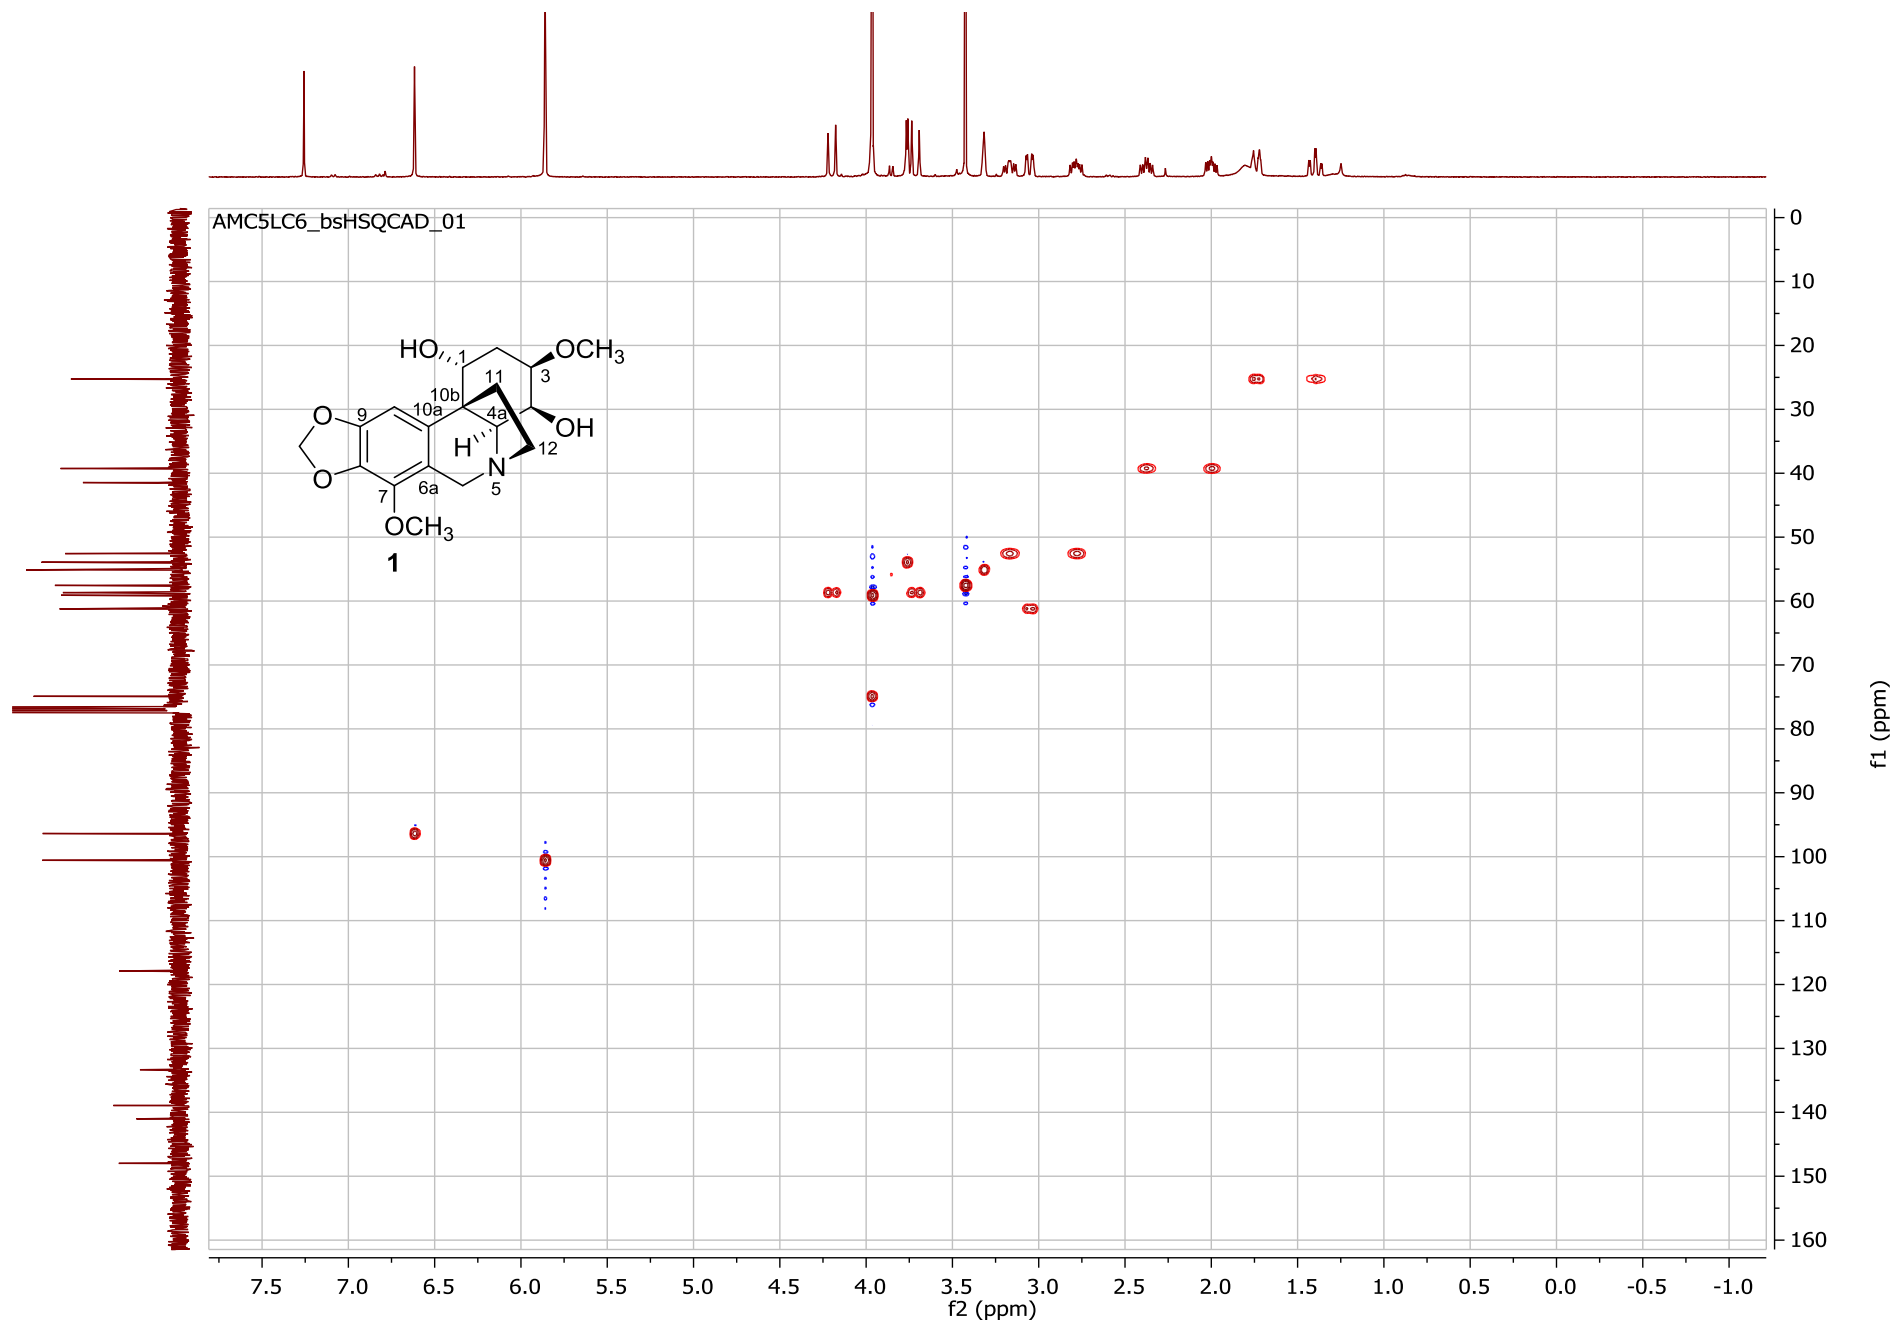

Figure S4. HSQC spectrum of compound **1** in CDCl<sub>3</sub>

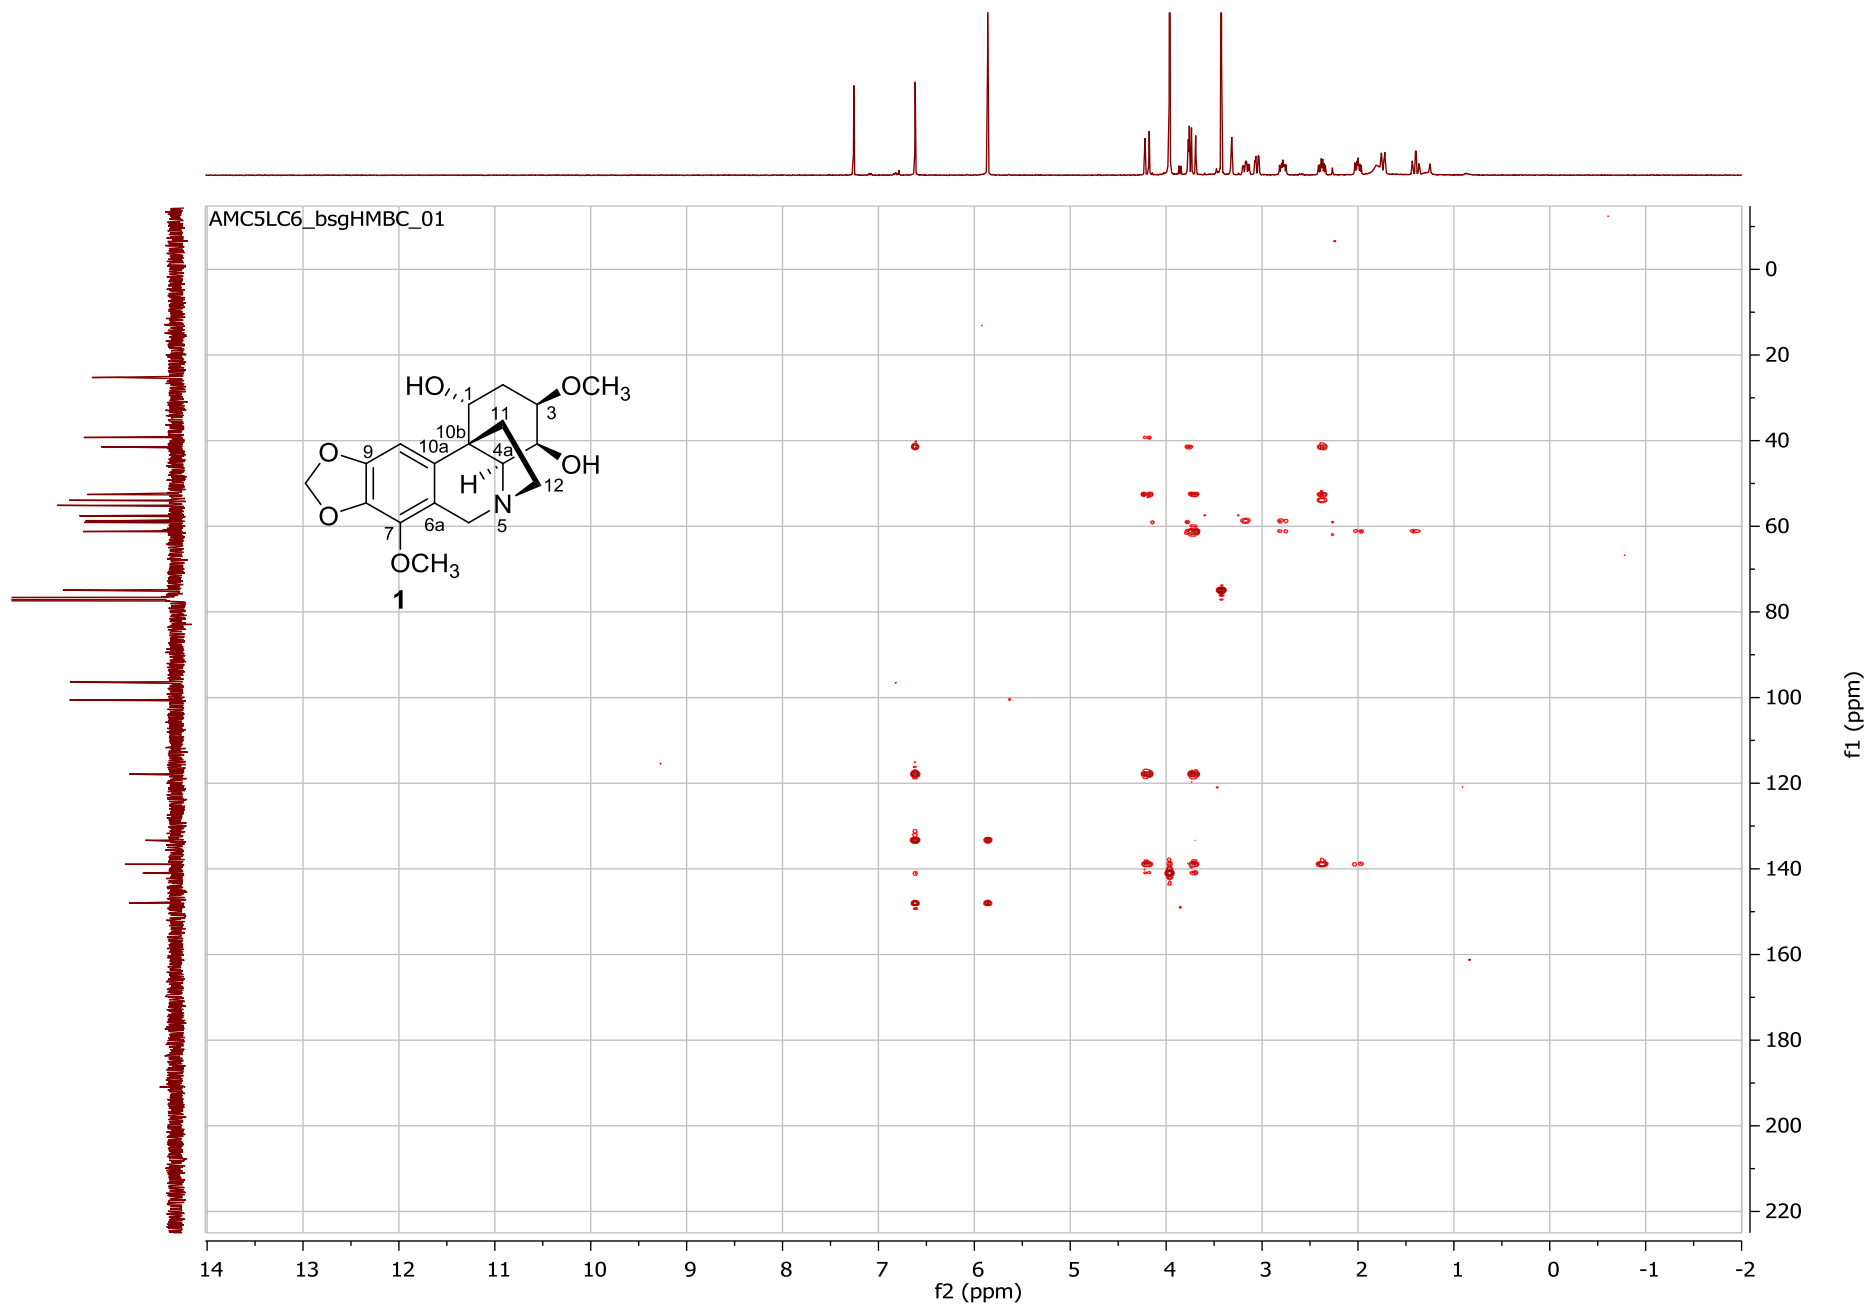

Figure S5. HMBC spectrum of compound **1** in CDCl<sub>3</sub>



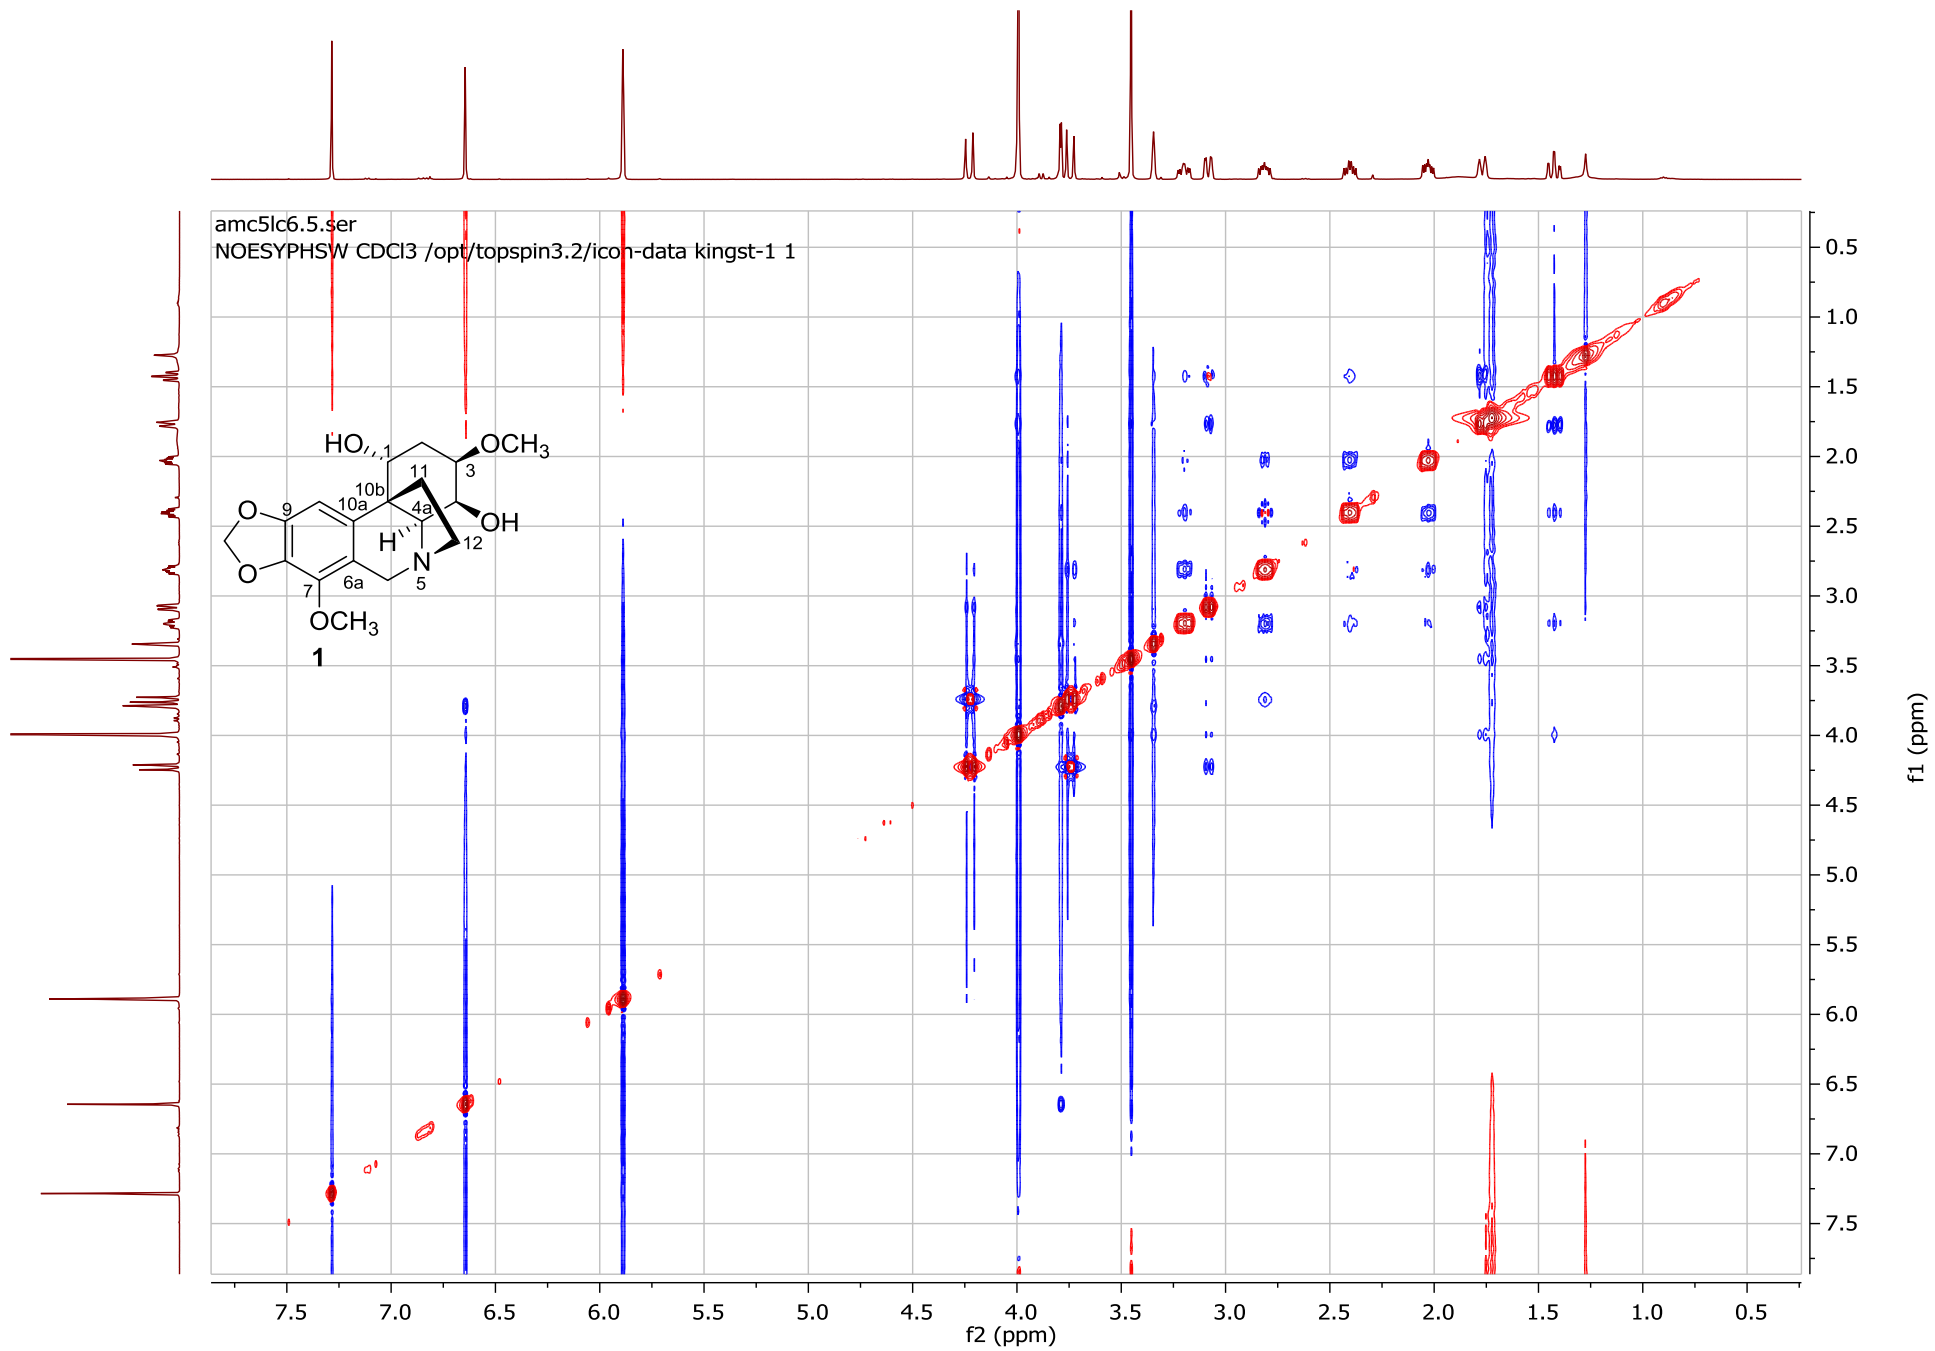

**Figure S6.** NOESY spectrum of compound **1** in CDCl<sub>3</sub>

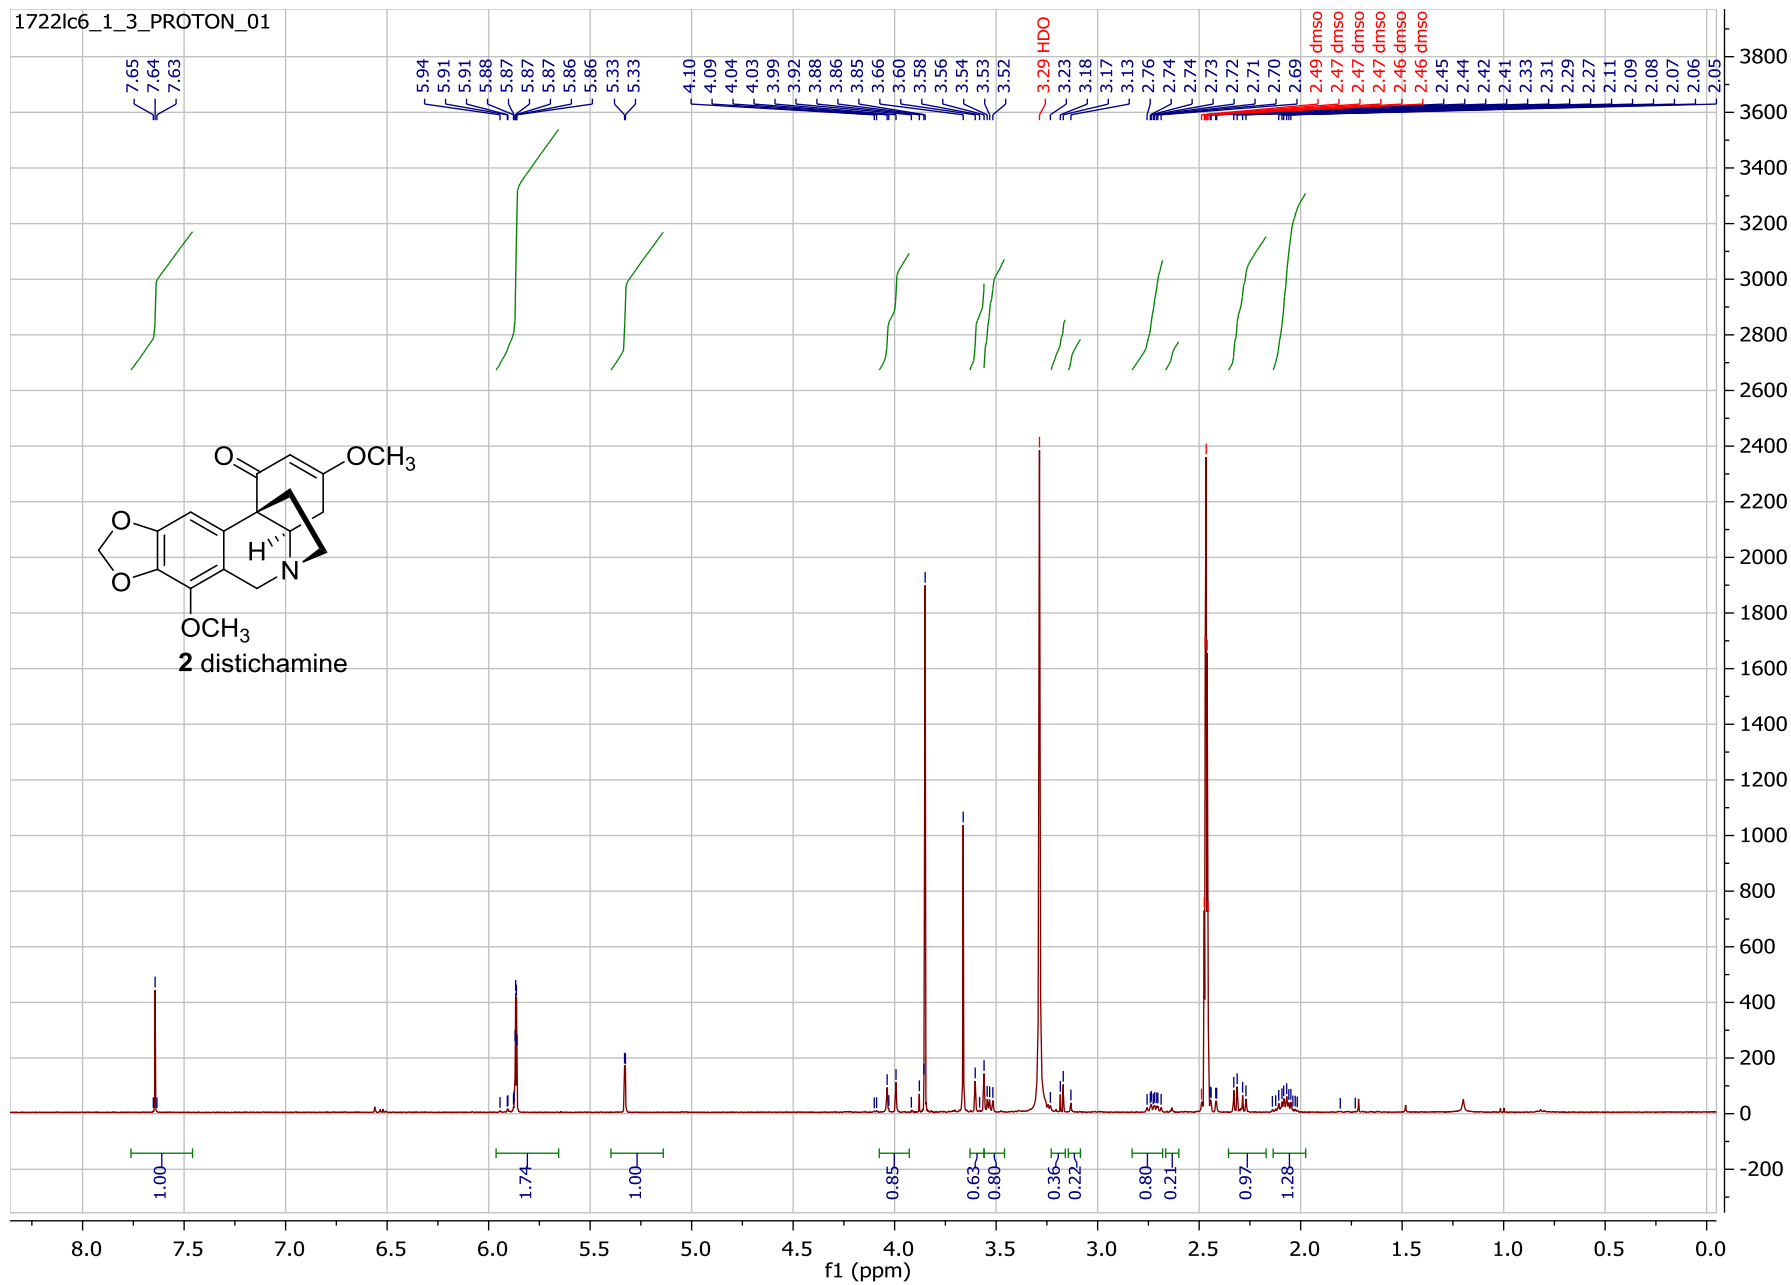

Figure S7. <sup>1</sup>H NMR spectrum (400 MHz) of compound 2 in DMSO

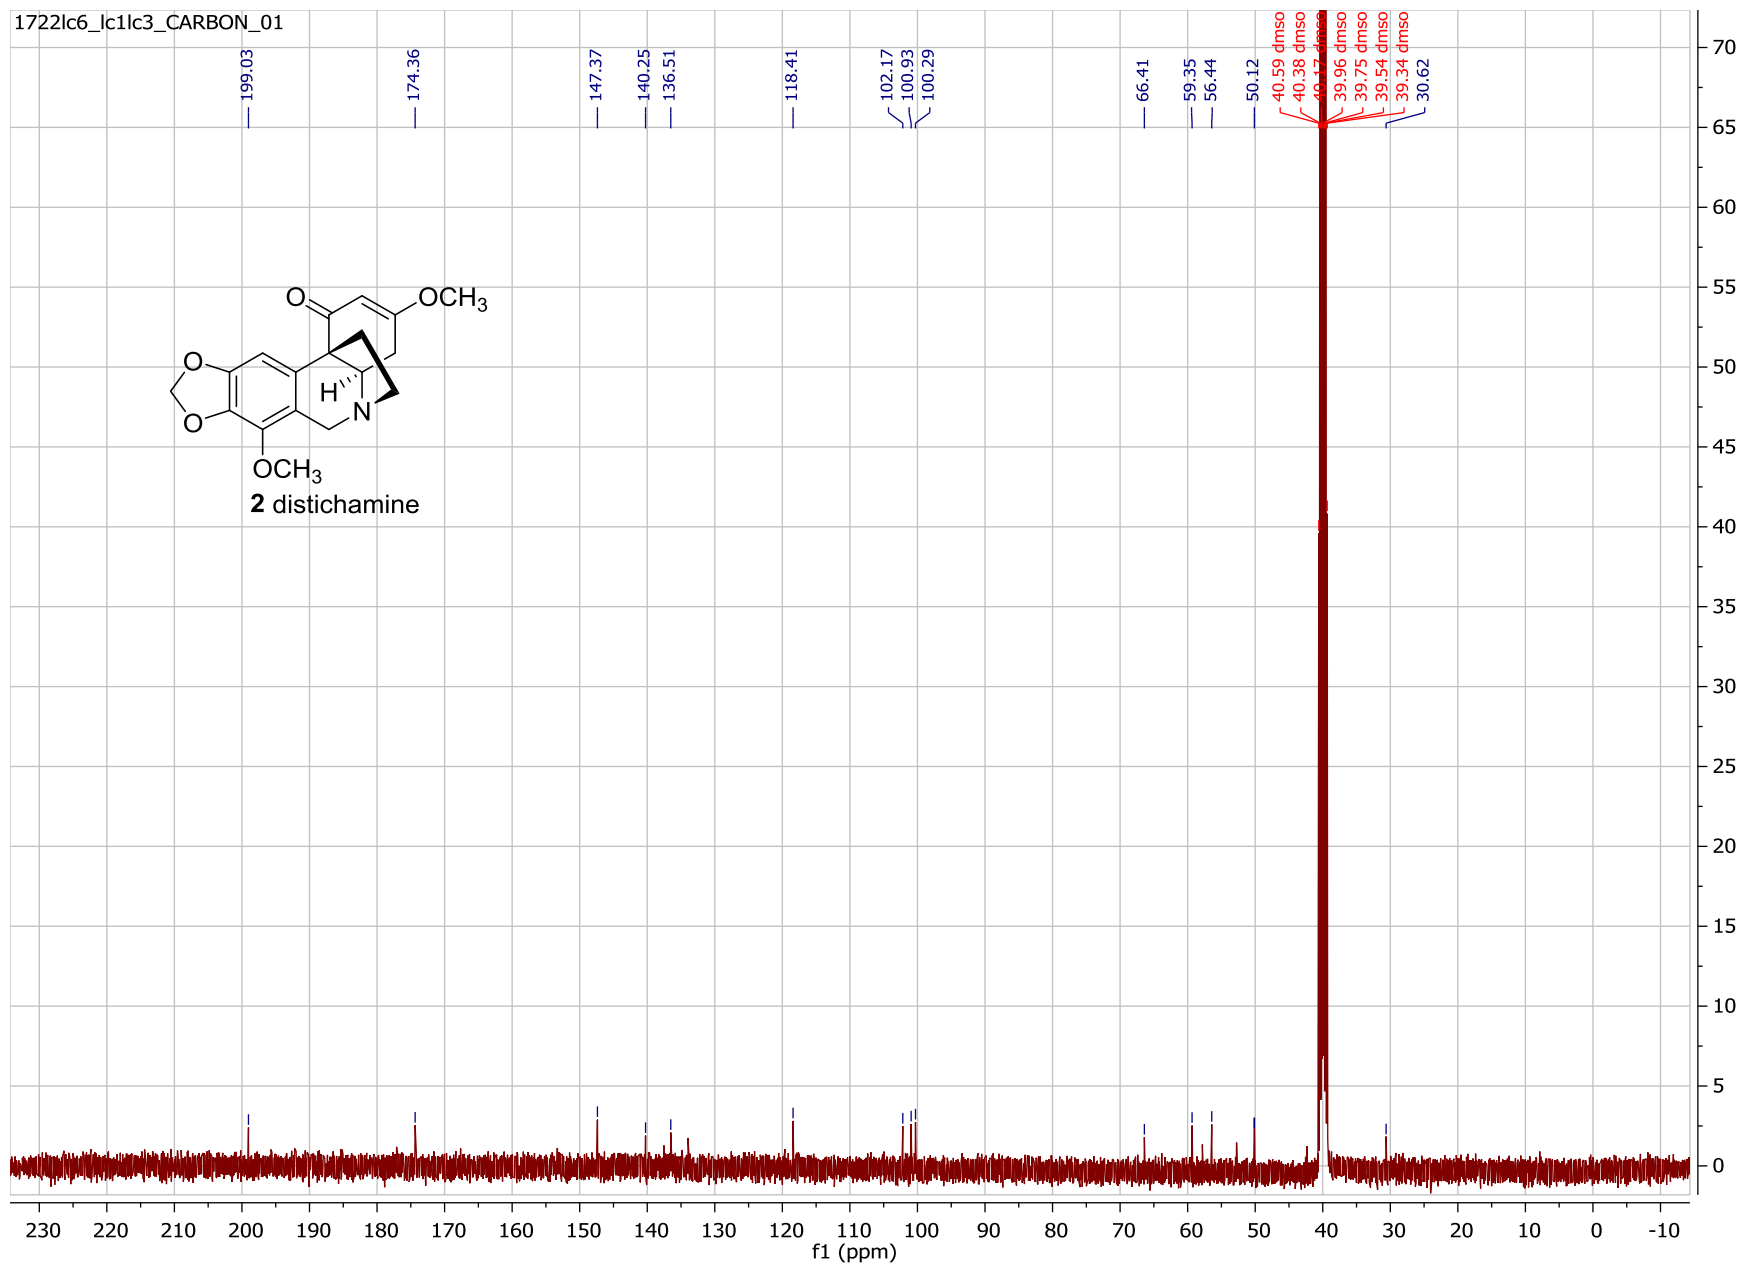

Figure S8.  $^{13}\text{C}$  NMR spectrum (400 MHz) of compound **2** in DMSO

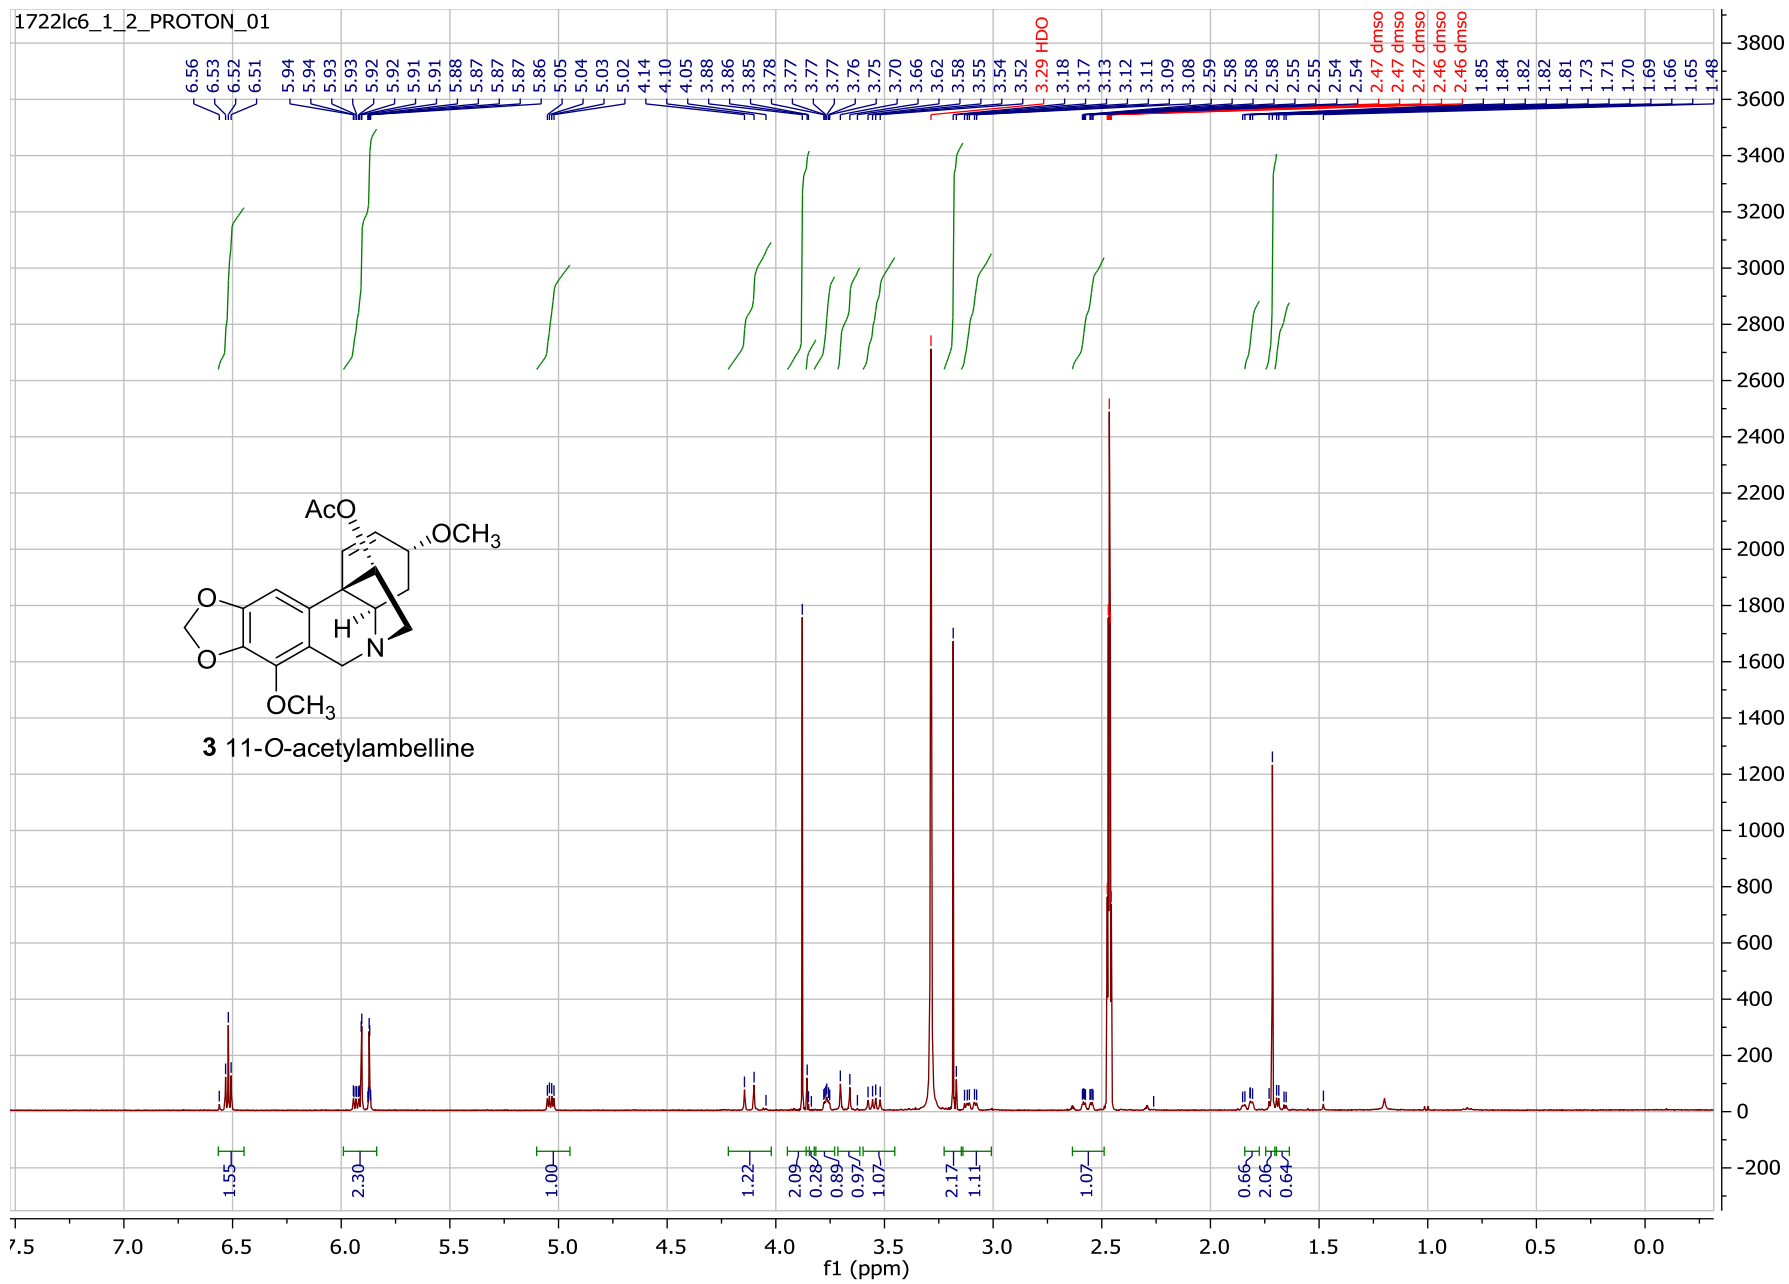

Figure S9. <sup>1</sup>H NMR spectrum (400 MHz) of compound **3** in DMSO

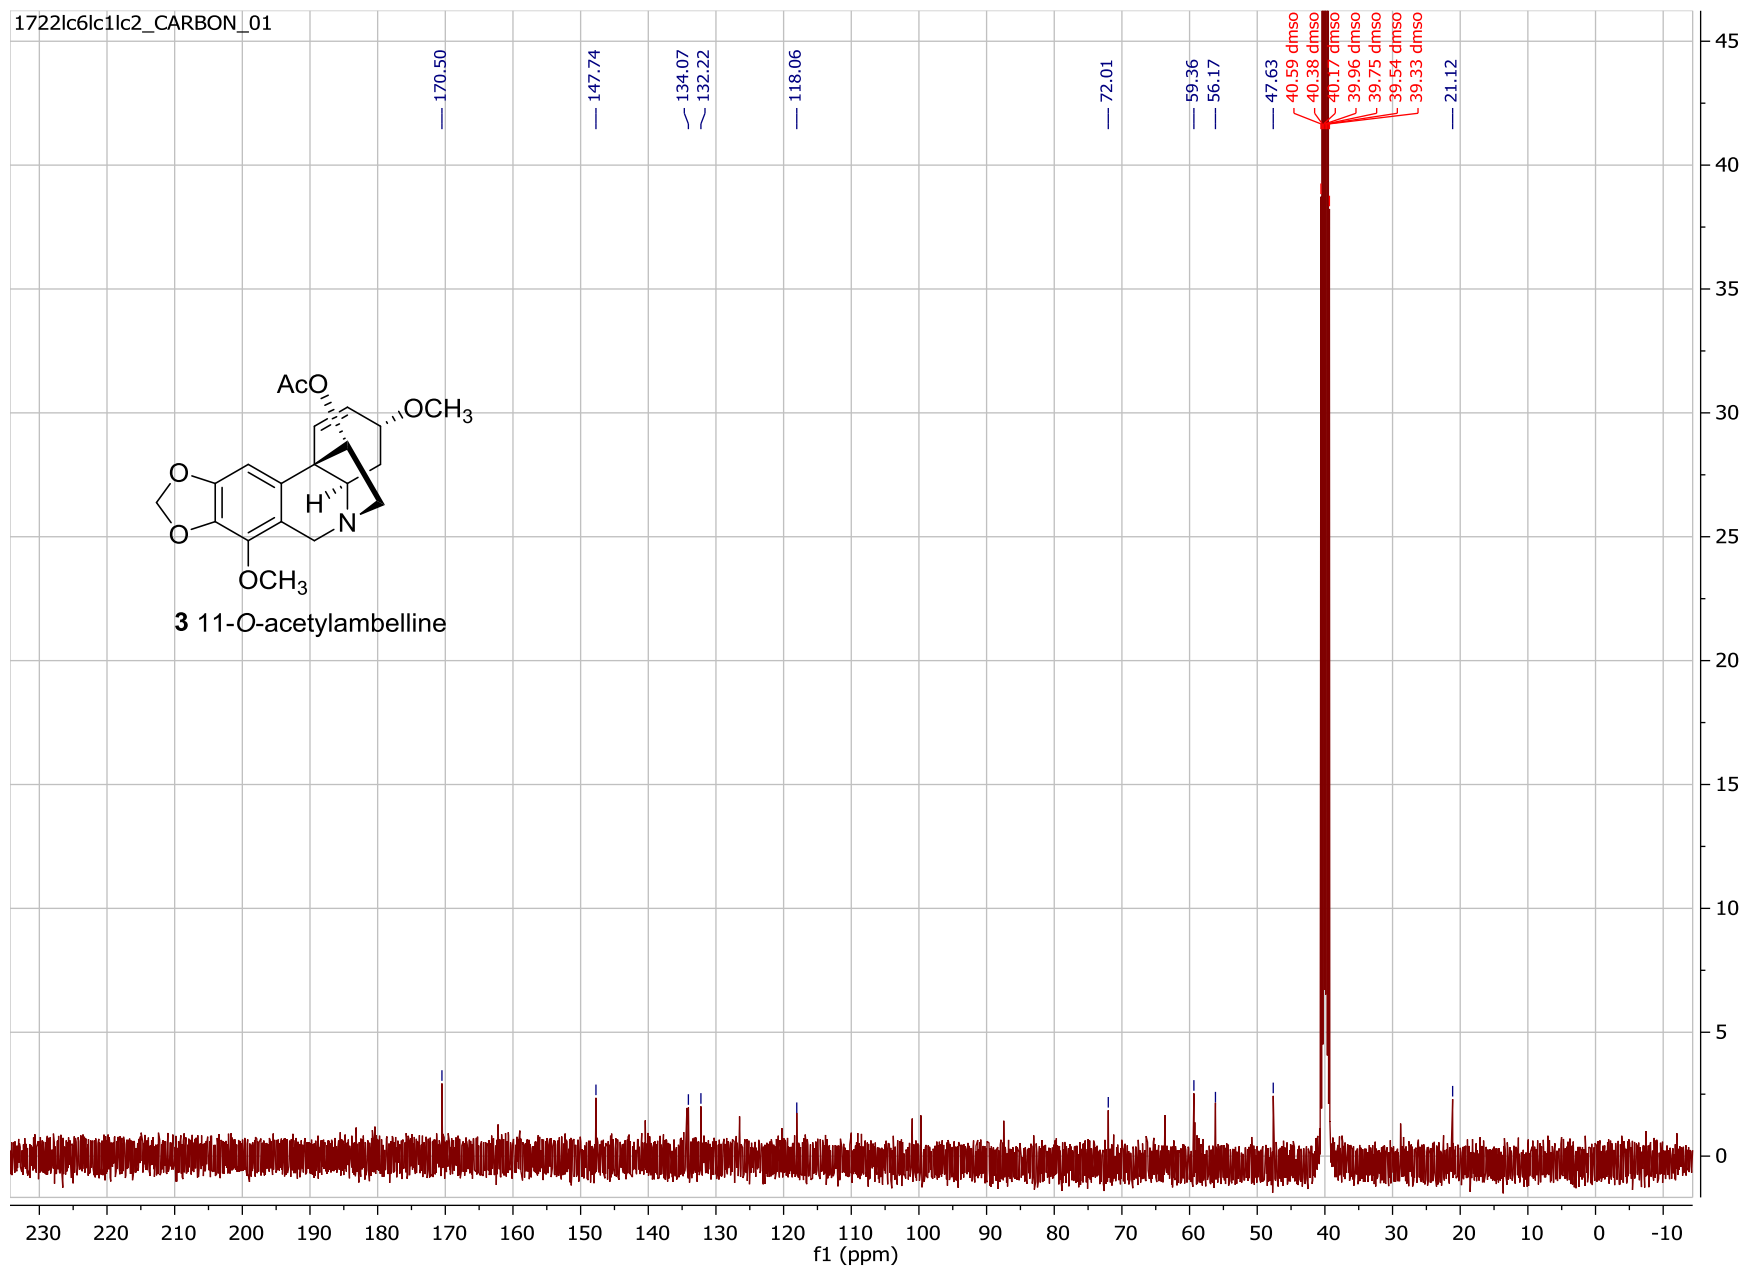

**Figure S10.**  $^{13}\text{C}$  NMR spectrum (400 MHz) of compound **3** in DMSO

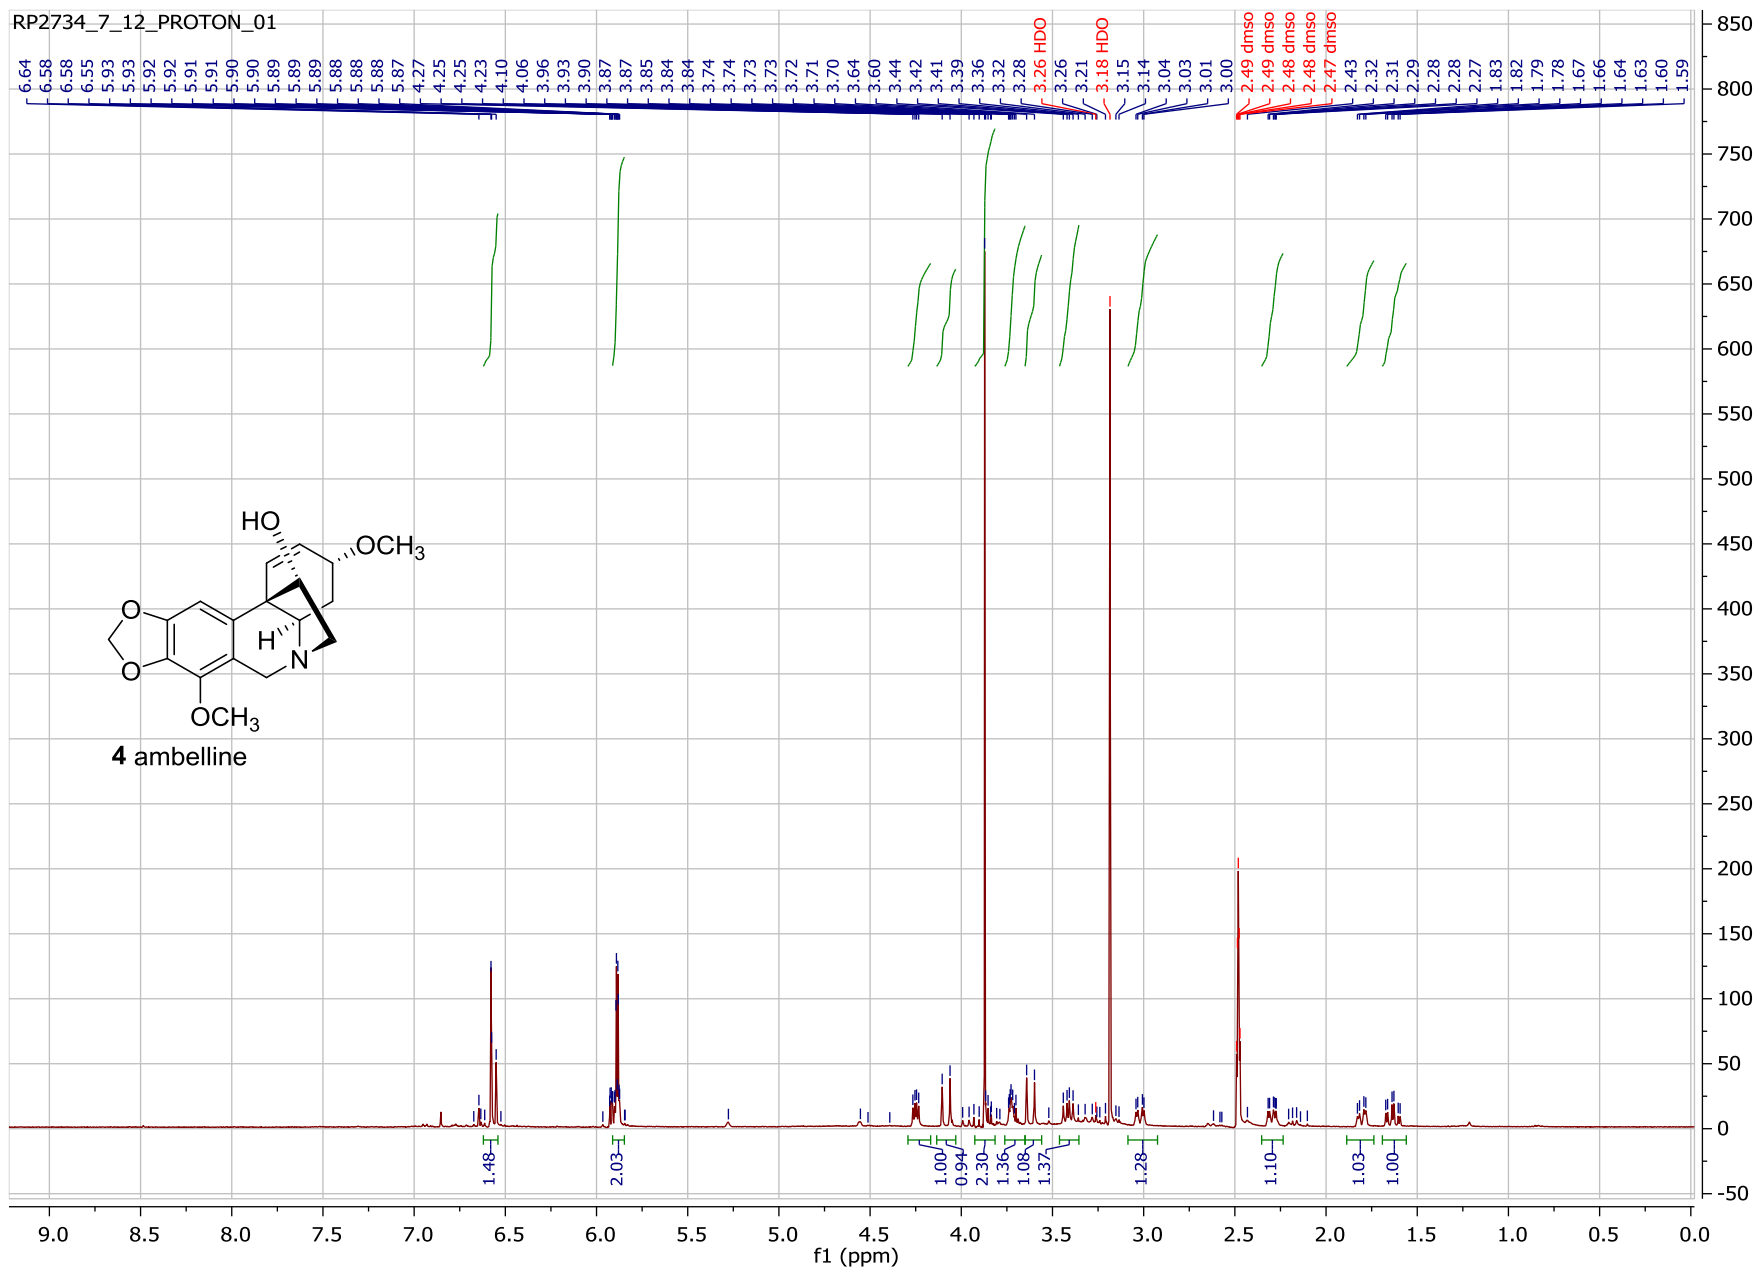

Figure S11. <sup>1</sup>H NMR spectrum (400 MHz) of compound 4 in DMSO

RP2734\_7\_12\_CARBON\_01

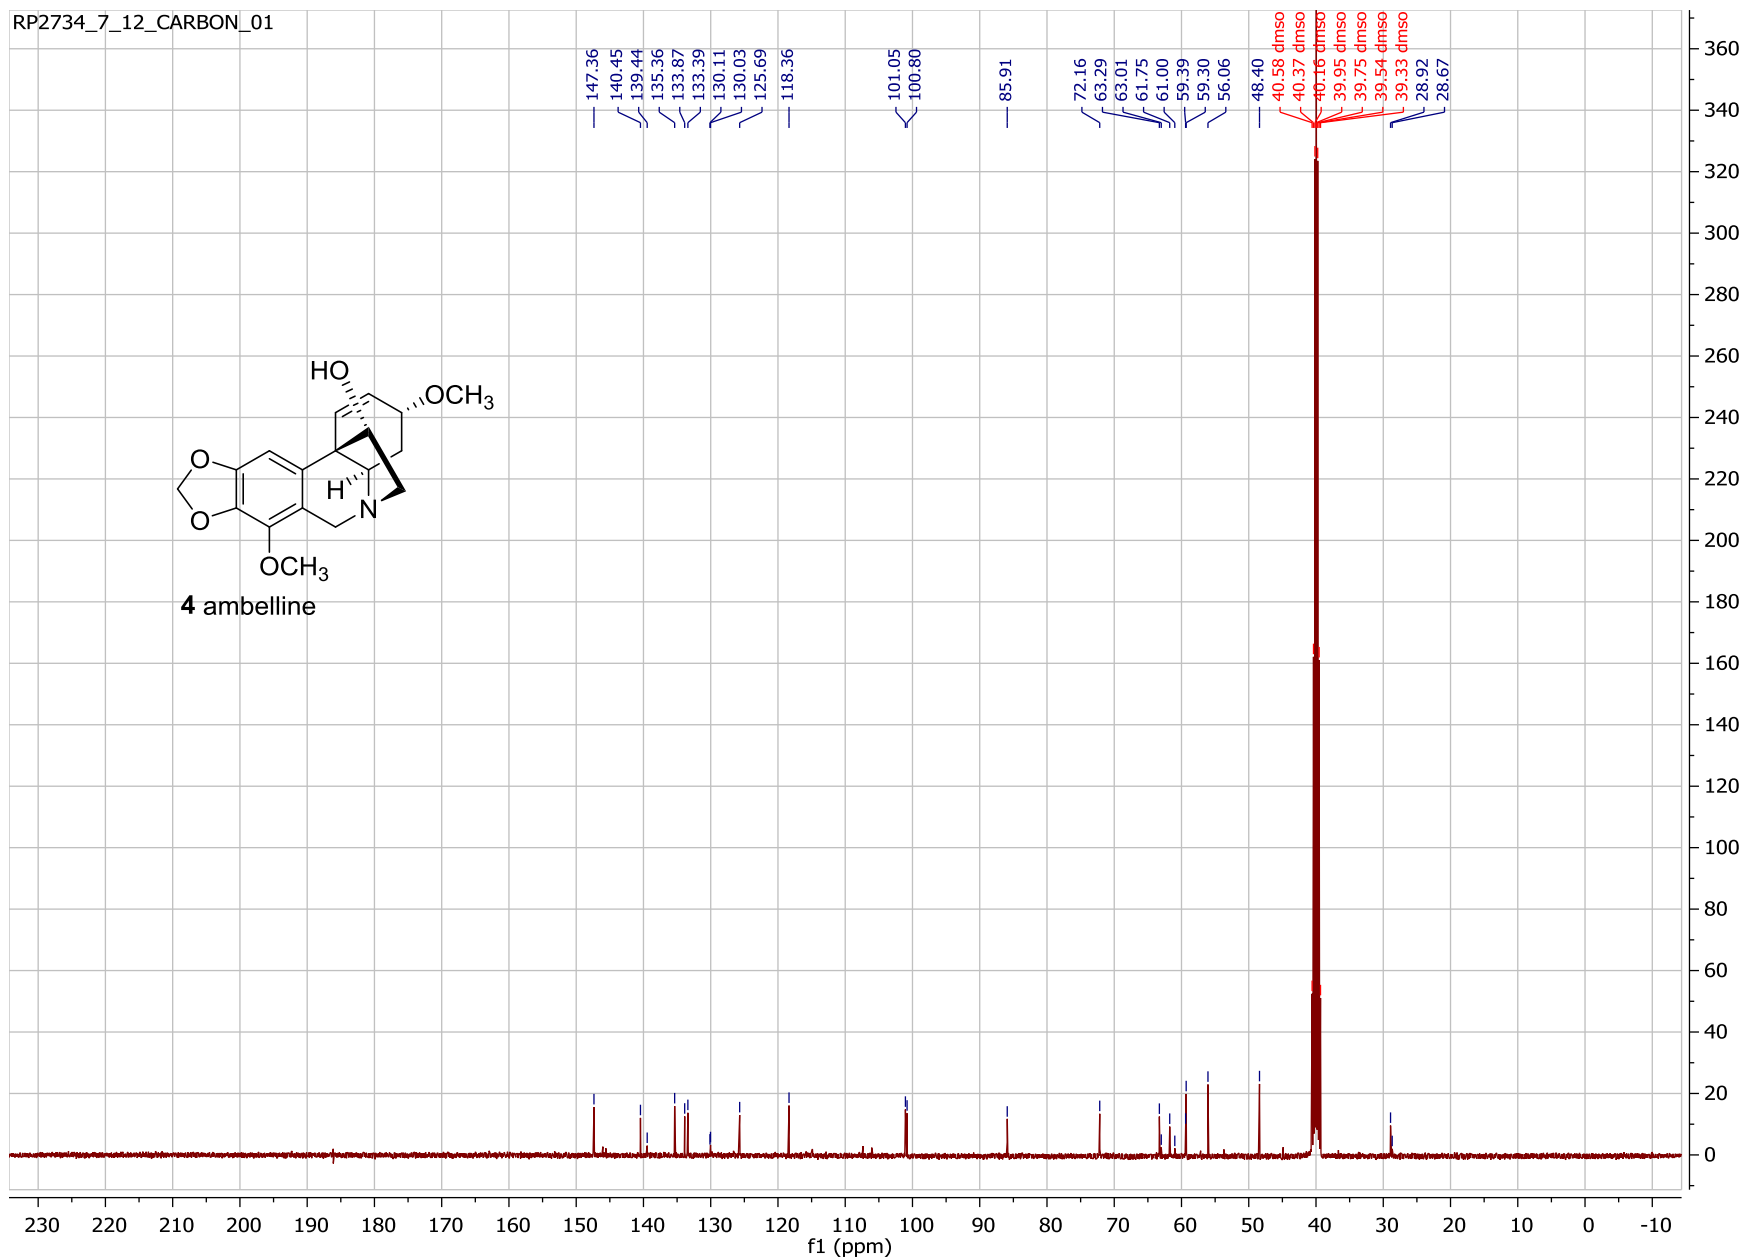

Figure S12. <sup>13</sup>C NMR spectrum (400 MHz) of compound 4 in DMSO

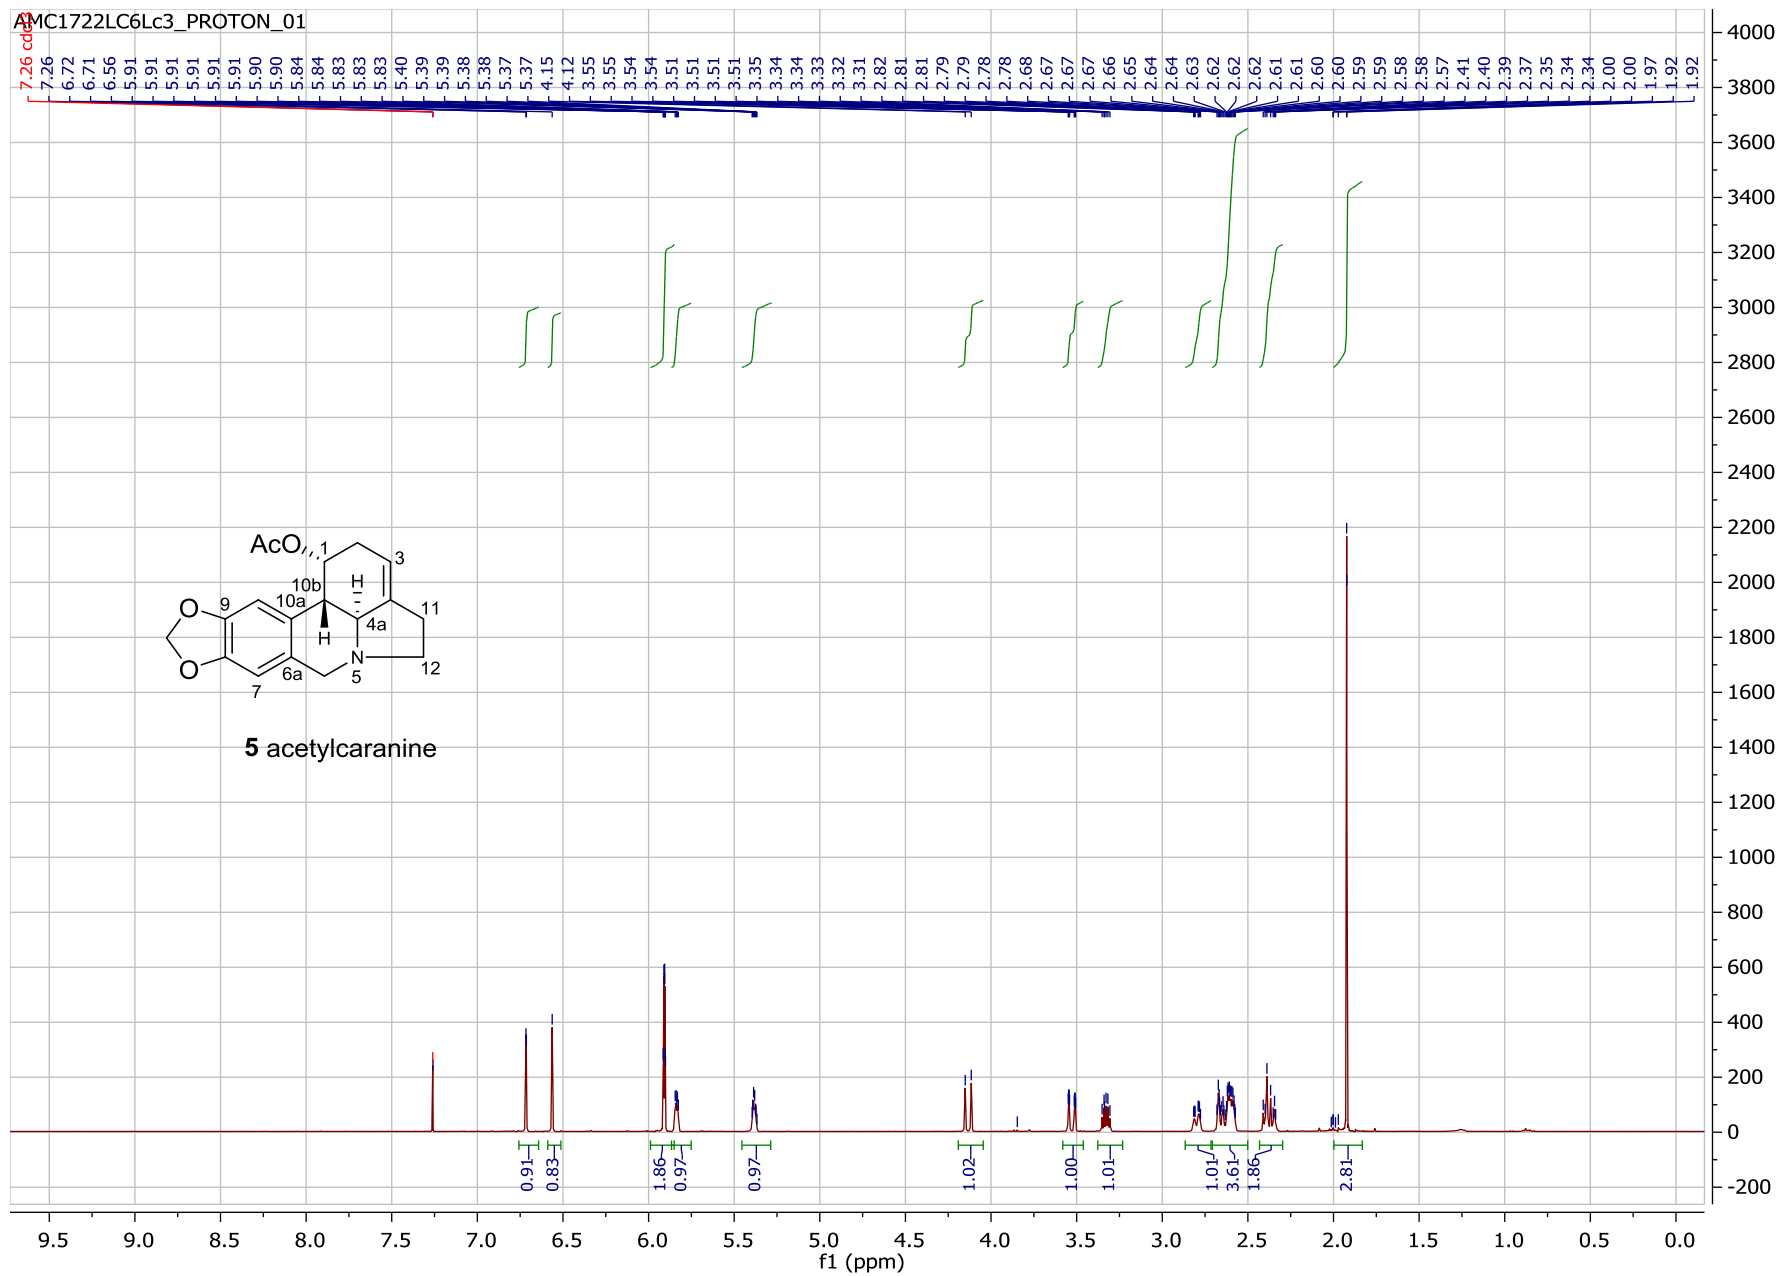

Figure S13.  $^1\text{H}$  NMR spectrum (400 MHz) of compound **5** in  $\text{CDCl}_3$



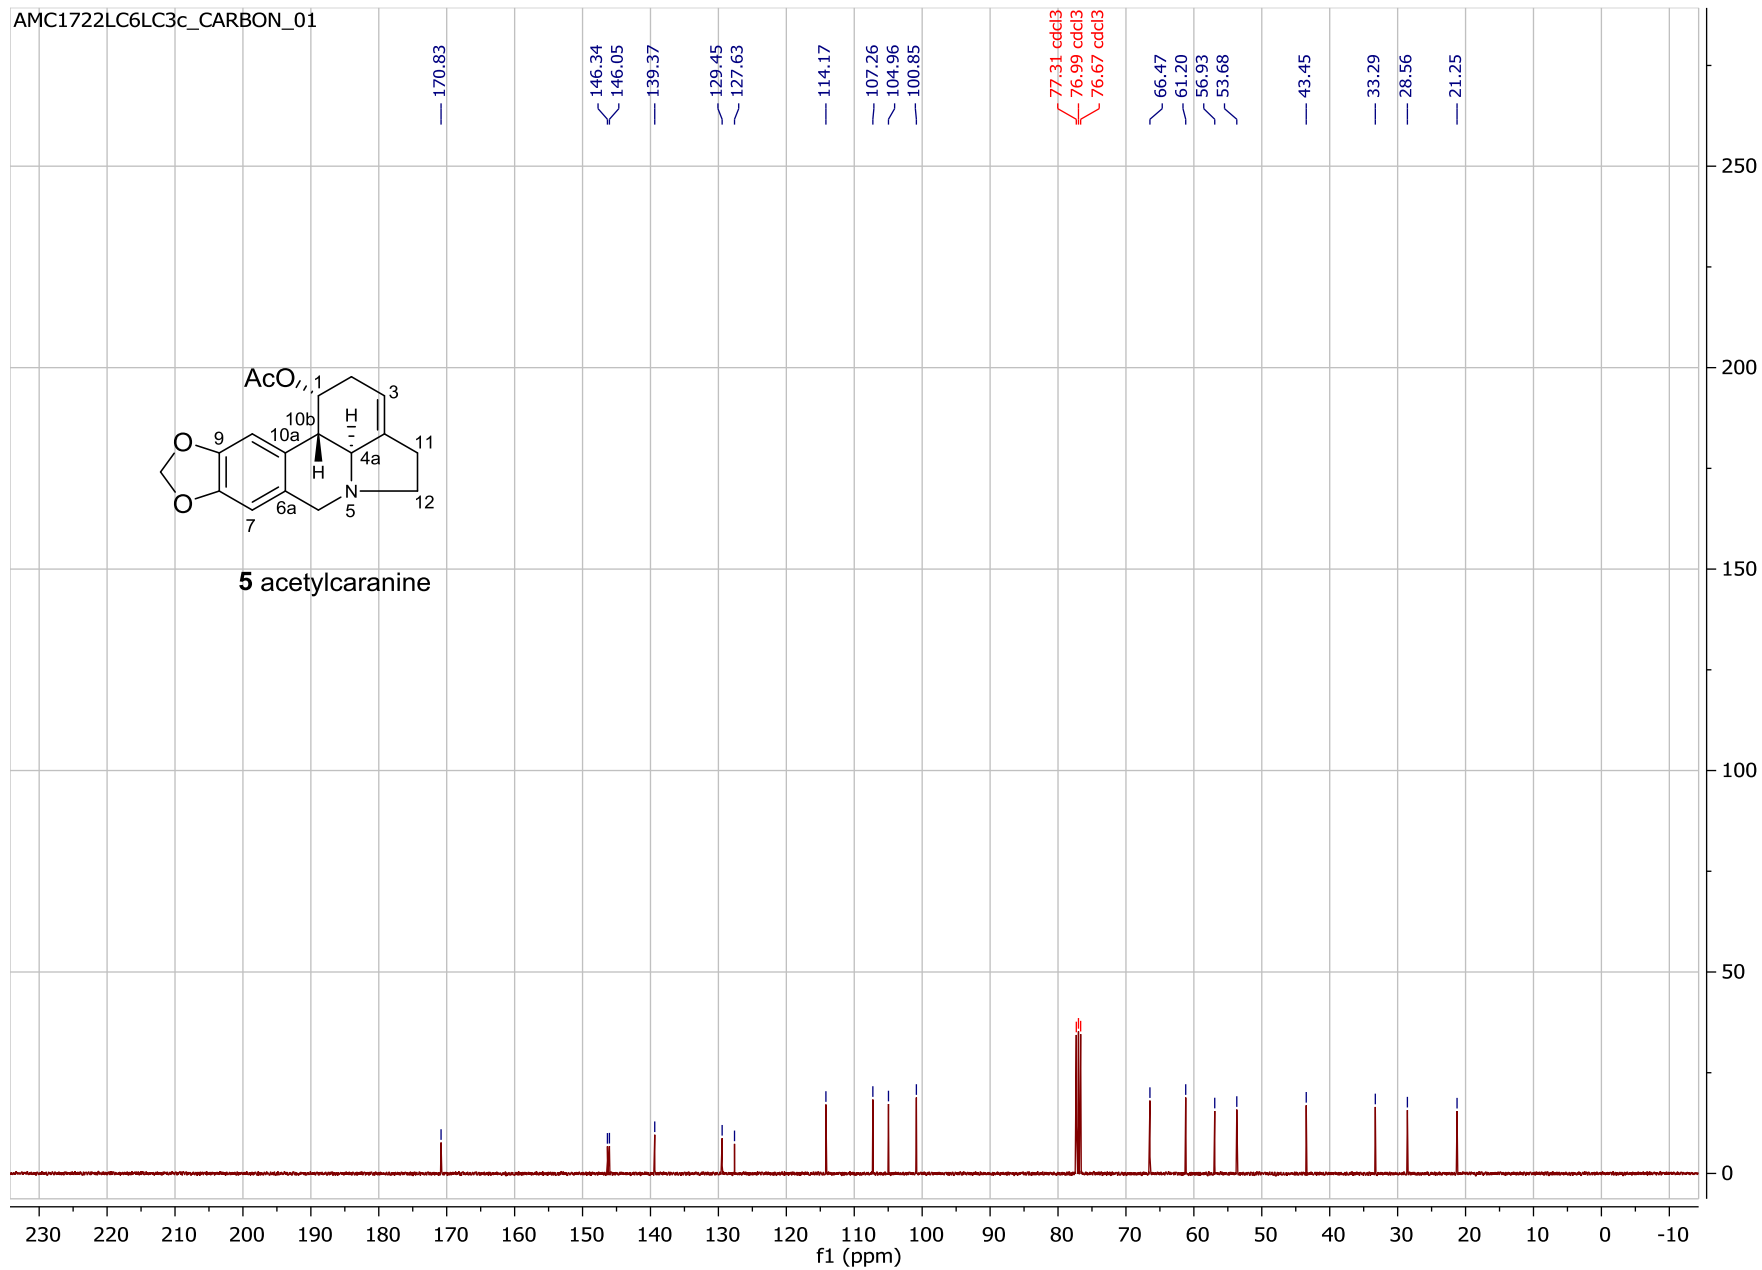

**Figure S14.**  $^{13}\text{C}$  NMR spectrum (400 MHz) of compound **5** in  $\text{CDCl}_3$

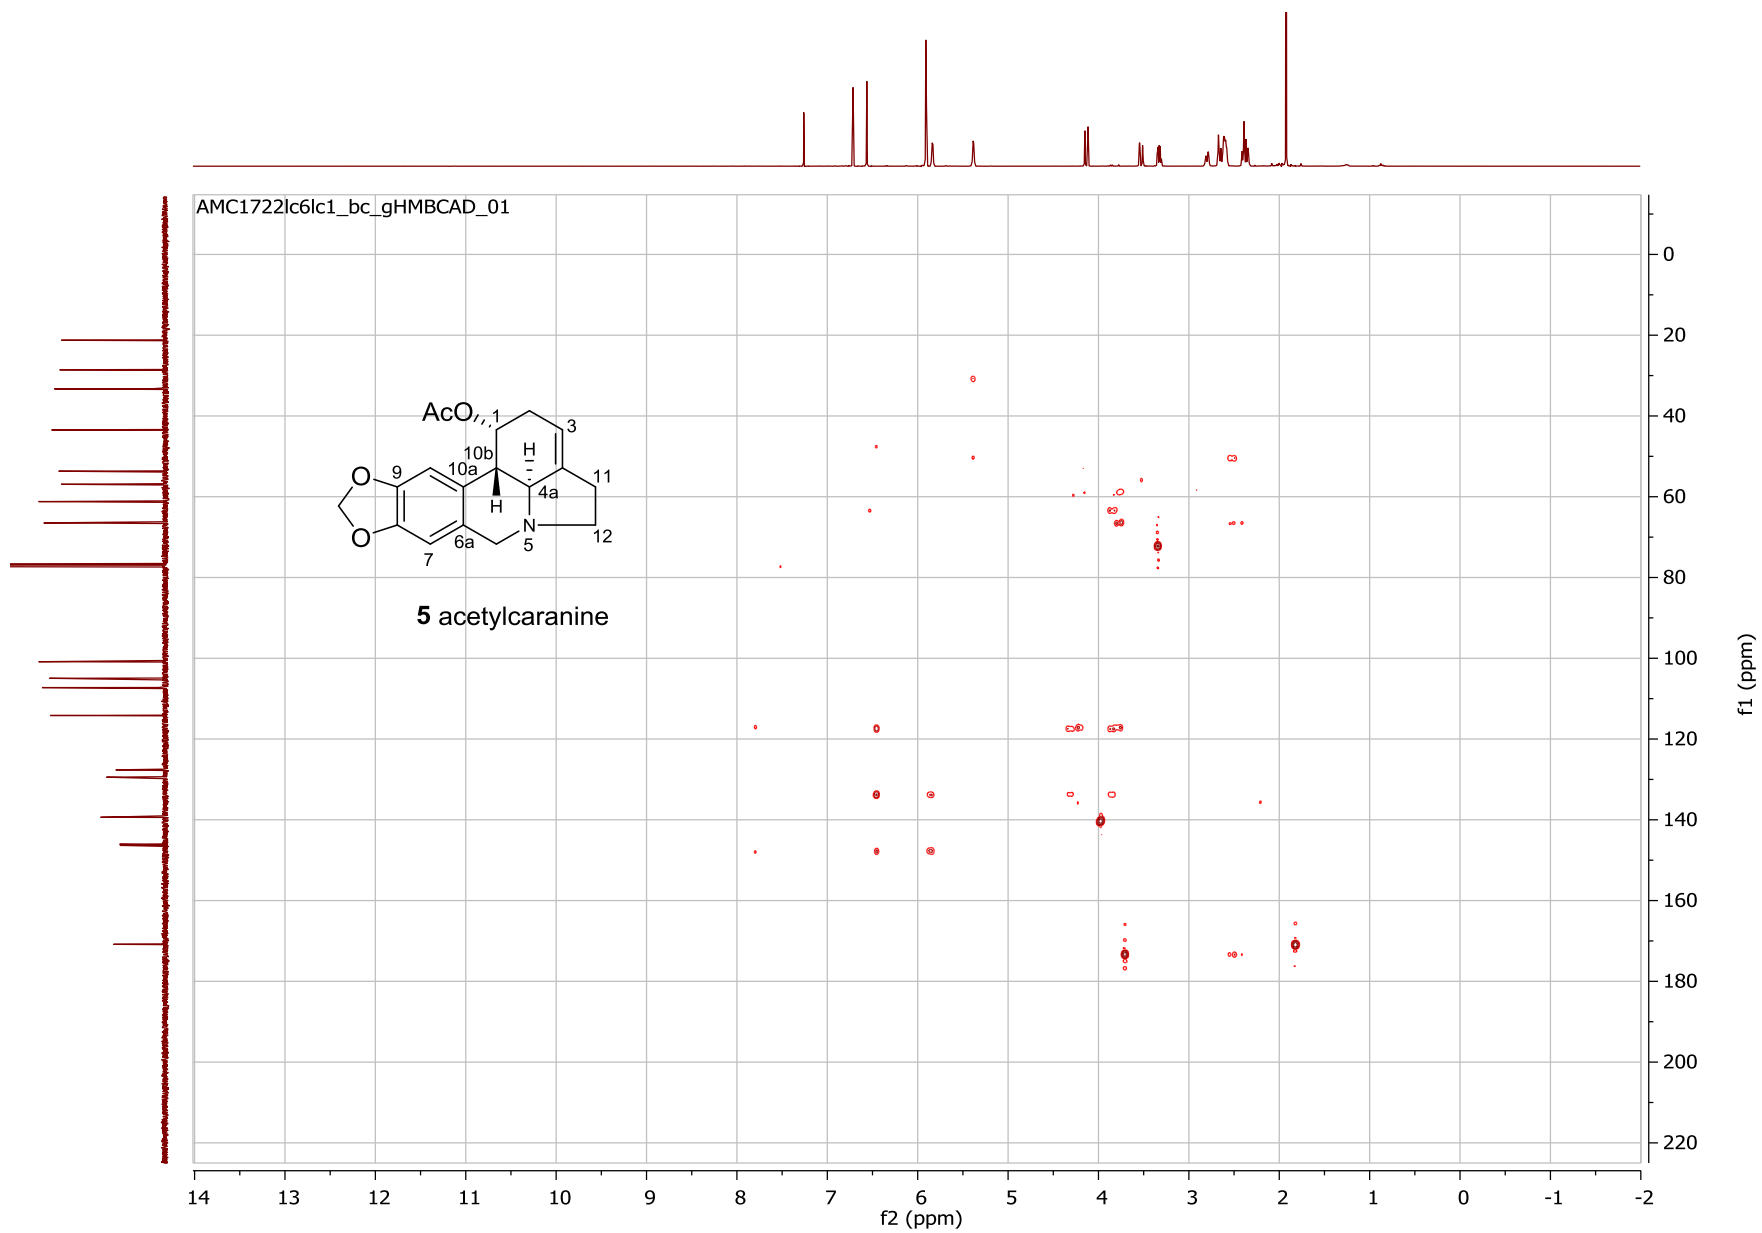

**Figure S15.** HMBC spectrum of compound **5** in  $\text{CDCl}_3$

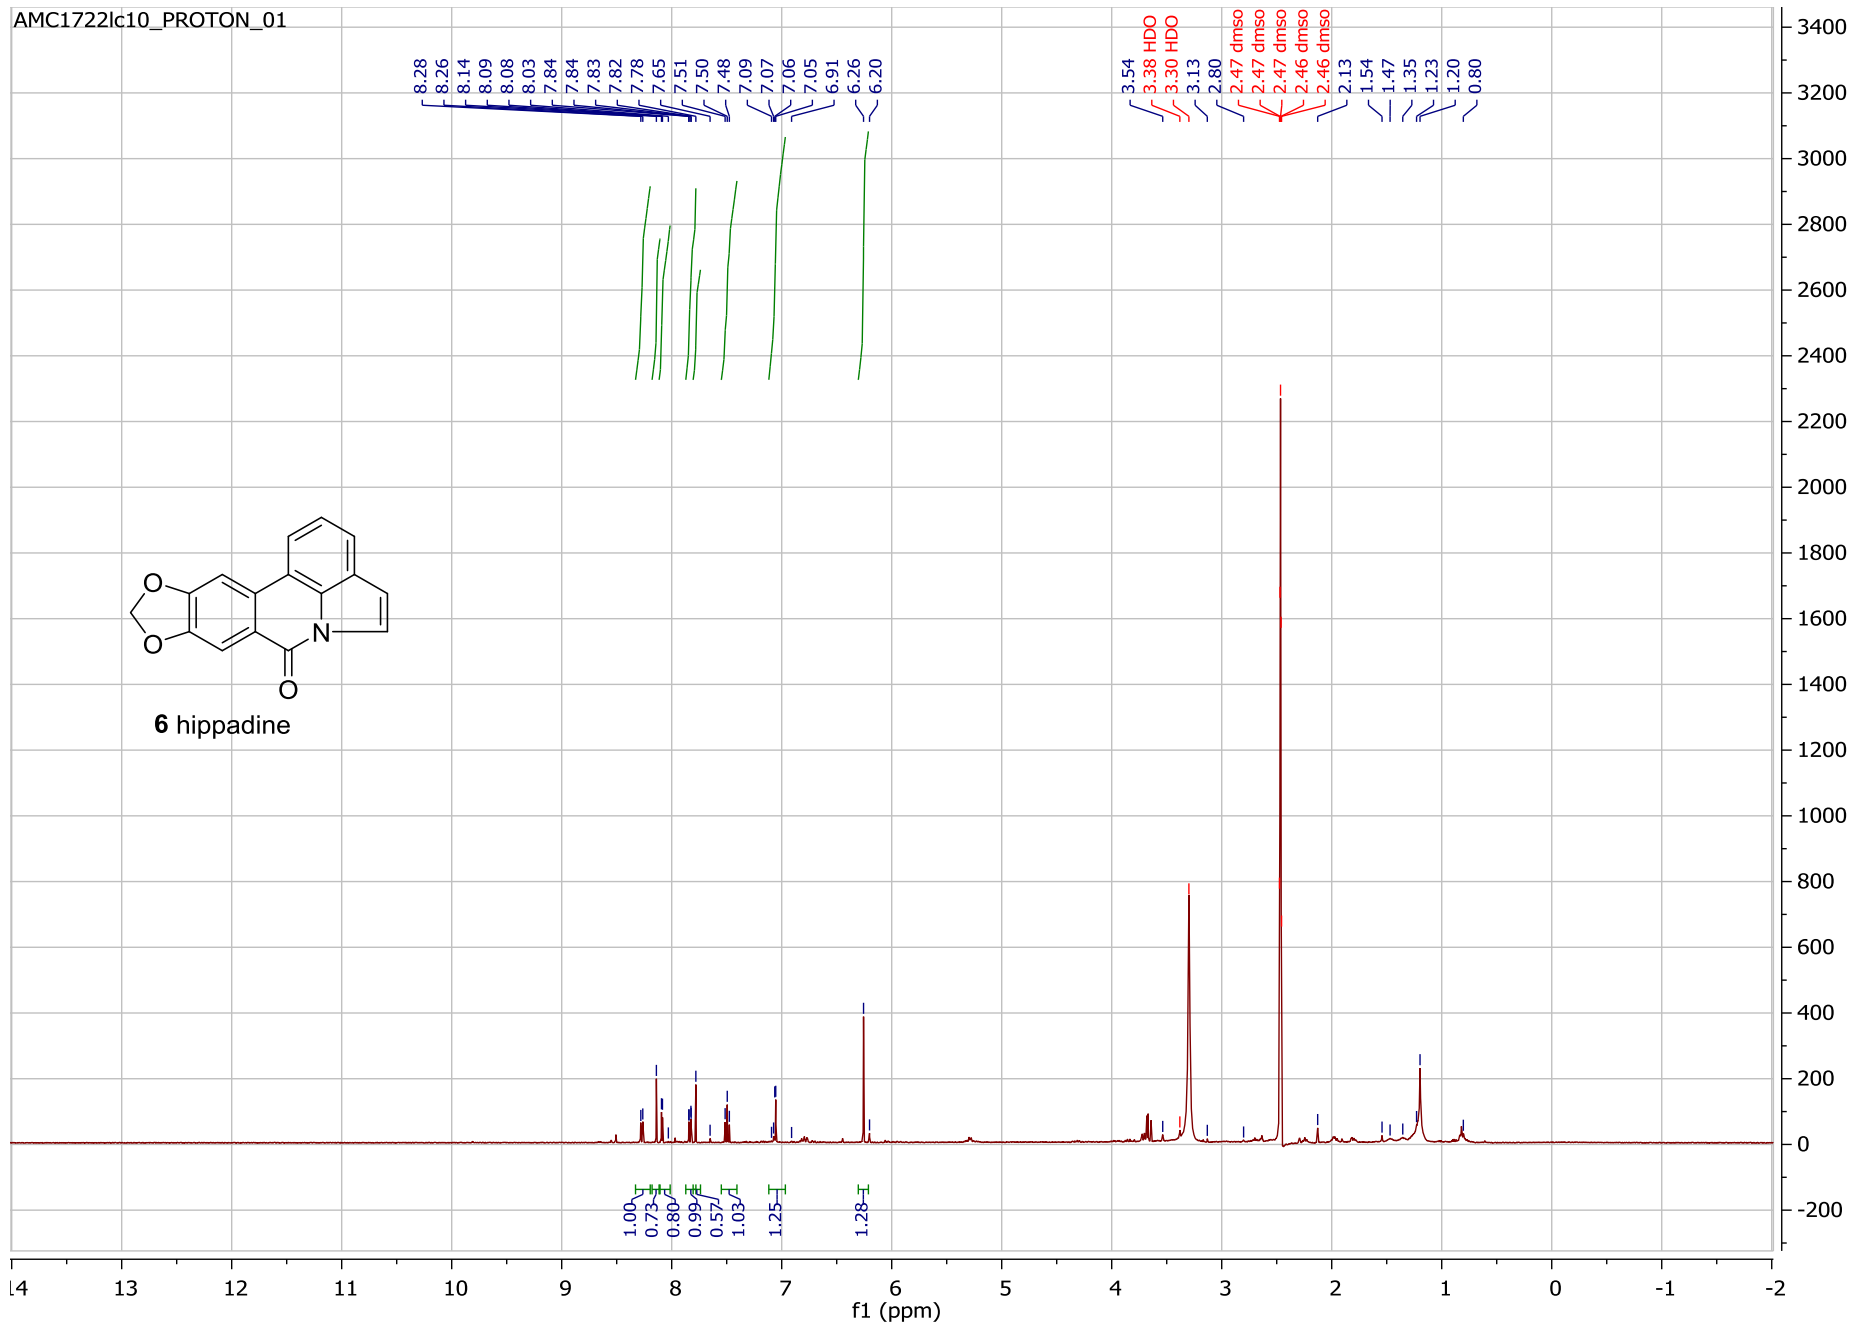

Figure S16. <sup>1</sup>H NMR spectrum (400 MHz) of compound 6 in DMSO

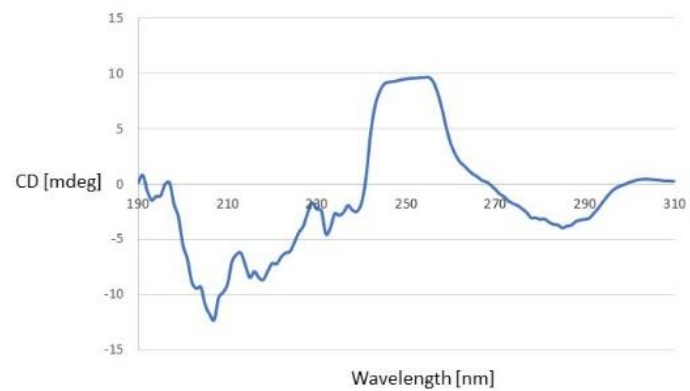

1

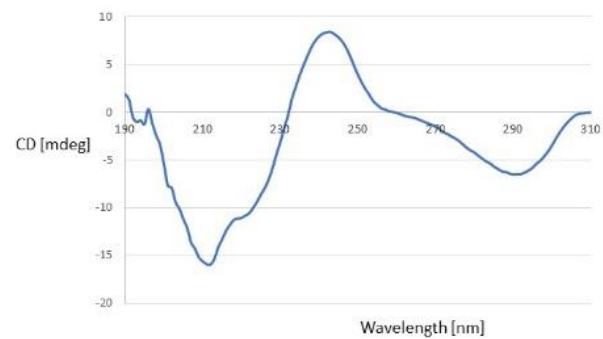

2

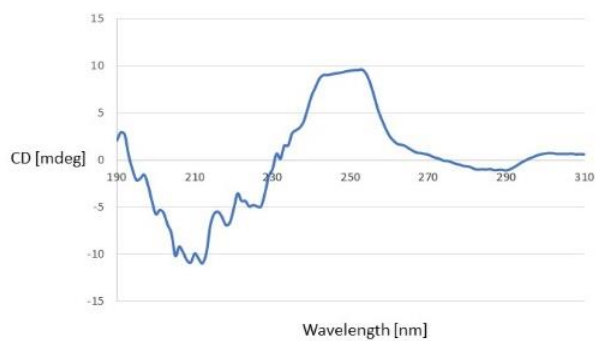

3

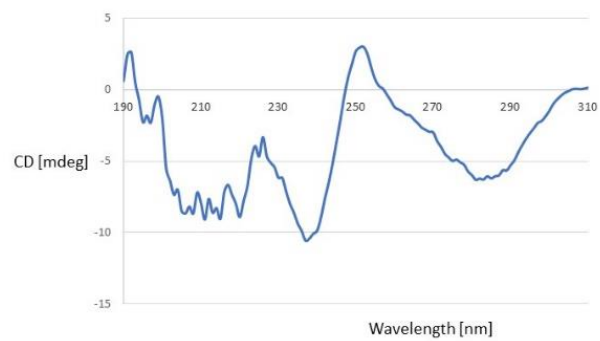

4

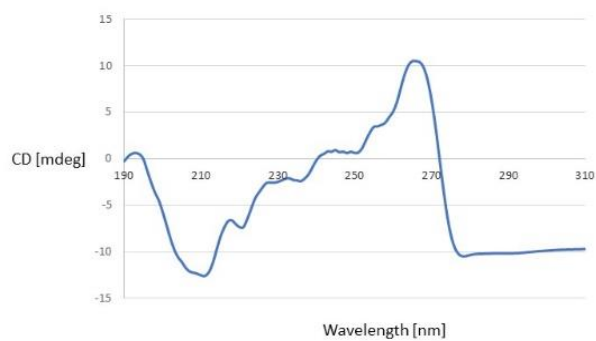

5

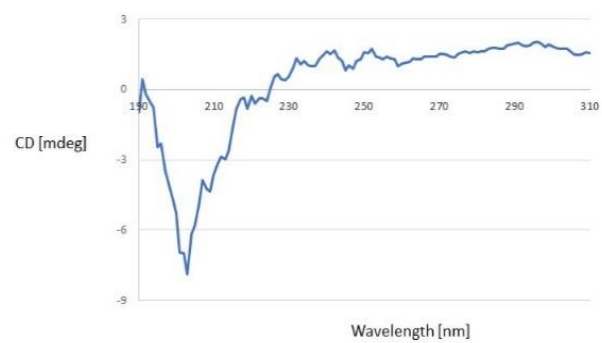

6

Figure S17. CD spectra of compounds 1-6

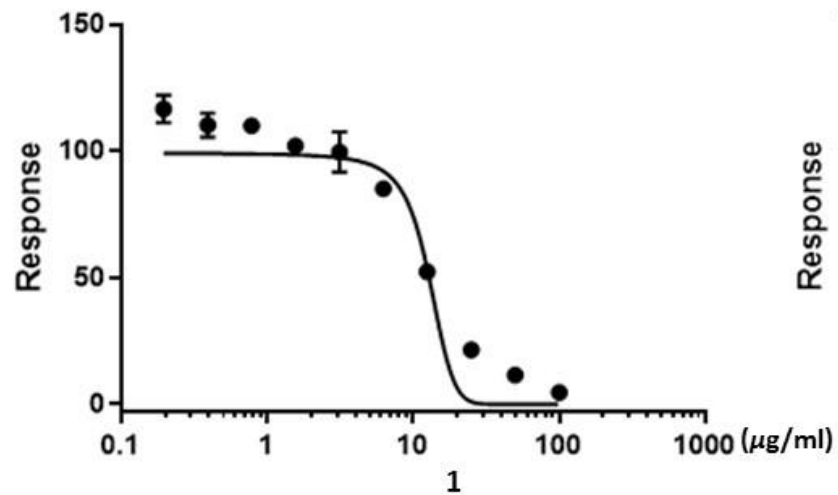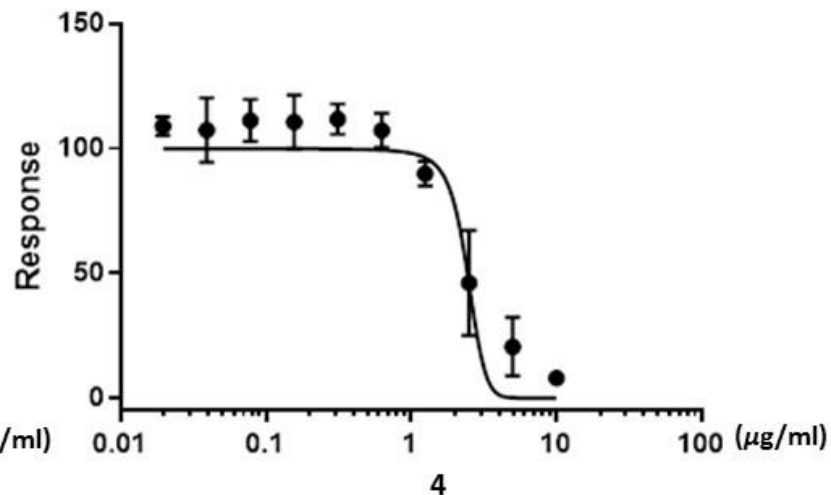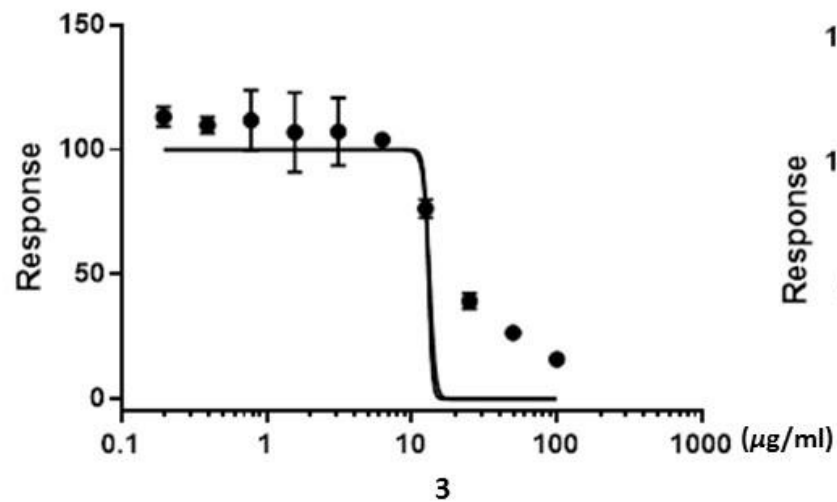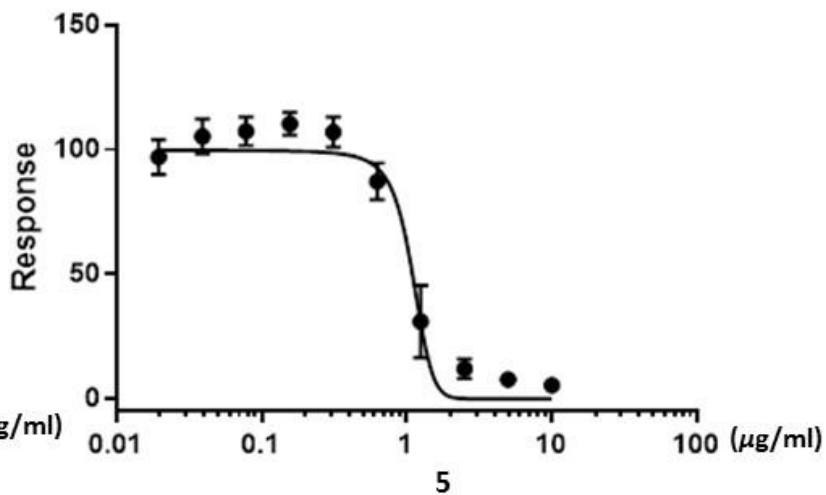

**Figure S18.** Dose-response curves for antiplasmodial assays of compounds **1**, **3**, **4**, and **5**.
